# Supplementary material
Source: PubMed Central journal article supplement (PMC5110386)
Supplement: NIHMS779959-supplement-4.pdf [file NIHMS779959-supplement-4.pdf]

## Document S1. Checklist summarizing compliance with MOOSE guidelines

|                                                                                                                                                                                                                                                                              |                                                                                                                                                                                                                                              |
|------------------------------------------------------------------------------------------------------------------------------------------------------------------------------------------------------------------------------------------------------------------------------|----------------------------------------------------------------------------------------------------------------------------------------------------------------------------------------------------------------------------------------------|
| <b>Reporting background should include</b>                                                                                                                                                                                                                                   |                                                                                                                                                                                                                                              |
| Problem definition                                                                                                                                                                                                                                                           | Pages 4-11                                                                                                                                                                                                                                   |
| Hypothesis statement                                                                                                                                                                                                                                                         | Page 10-11                                                                                                                                                                                                                                   |
| Description                                                                                                                                                                                                                                                                  | Pages 4-11                                                                                                                                                                                                                                   |
| Type of exposure or intervention used                                                                                                                                                                                                                                        | Pages 5-6                                                                                                                                                                                                                                    |
| Type of study designs used                                                                                                                                                                                                                                                   | Page 10-11                                                                                                                                                                                                                                   |
| Study population                                                                                                                                                                                                                                                             | Pages 10-11                                                                                                                                                                                                                                  |
| <b>Reporting of search strategy should include</b>                                                                                                                                                                                                                           |                                                                                                                                                                                                                                              |
| Qualifications of searches (e.g. librarians and investigators)                                                                                                                                                                                                               | Page 12                                                                                                                                                                                                                                      |
| Search strategy, including time period included in the synthesis and keywords                                                                                                                                                                                                | Page 12                                                                                                                                                                                                                                      |
| Effort to include all available studies, including contact with authors                                                                                                                                                                                                      | Page 12                                                                                                                                                                                                                                      |
| Databases and registries searched                                                                                                                                                                                                                                            | Page 12                                                                                                                                                                                                                                      |
| Search software used, name and version, including special features                                                                                                                                                                                                           | Page 12                                                                                                                                                                                                                                      |
| Use of hand searching (e.g. reference lists of obtained articles)                                                                                                                                                                                                            | Page 12                                                                                                                                                                                                                                      |
| List of citations located and those excluded including justification                                                                                                                                                                                                         | Pages 42-74                                                                                                                                                                                                                                  |
| Method of addressing articles published in languages other than English                                                                                                                                                                                                      | The authors of this manuscript are German, Italian and American. For this reason articles published in German and Italian were also searched. As two authors know respectively Spanish and French, these two languages were also considered. |
| Method of handling abstracts and unpublished studies                                                                                                                                                                                                                         | Unpublished literature was not considered (page 12)                                                                                                                                                                                          |
| Description of any contact with authors                                                                                                                                                                                                                                      | Page 12                                                                                                                                                                                                                                      |
| <b>Reporting methods should include</b>                                                                                                                                                                                                                                      |                                                                                                                                                                                                                                              |
| Description of relevance or appropriateness of studies assembled for assessing the hypothesis to be tested                                                                                                                                                                   | Pages 11 and 12                                                                                                                                                                                                                              |
| Rationale for the selection and coding of data (eg, sound clinical principles or convenience)                                                                                                                                                                                | Pages 11 and 12                                                                                                                                                                                                                              |
| Documentation of how data were classified and coded (eg, multiple raters, blinding, and interrater reliability)                                                                                                                                                              | Page 12                                                                                                                                                                                                                                      |
| Assessment of confounding (eg, comparability of cases and controls in studies where appropriate)                                                                                                                                                                             | Pages 11 and 12                                                                                                                                                                                                                              |
| Assessment of study quality, including blinding of quality assessors; stratification or regression on possible predictors of study results                                                                                                                                   | Pages 14 and 15                                                                                                                                                                                                                              |
| Assessment of heterogeneity                                                                                                                                                                                                                                                  | Page 17                                                                                                                                                                                                                                      |
| Description of statistical methods (eg, complete description of fixed or random effects models, justification of whether the chosen models account for predictors of study results, dose-response models, or cumulative meta-analysis) in sufficient detail to be replicated | Pages 16 and 17                                                                                                                                                                                                                              |
| Provision of appropriate tables and graphics                                                                                                                                                                                                                                 | Results section                                                                                                                                                                                                                              |
| <b>Reporting of results should include</b>                                                                                                                                                                                                                                   |                                                                                                                                                                                                                                              |
| Graphic summarizing individual study estimates and overall estimate                                                                                                                                                                                                          | Tables 3-5 and Figure 2                                                                                                                                                                                                                      |

|                                                                                                                           |                 |
|---------------------------------------------------------------------------------------------------------------------------|-----------------|
| Table giving descriptive information for each study included                                                              | Table S1        |
| Results of sensitivity testing (eg, subgroup analysis)                                                                    | Pages 20-23     |
| Indication of statistical uncertainty of findings                                                                         | Page 23         |
| <b>Reporting of discussion should include</b>                                                                             |                 |
| Quantitative assessment of bias (eg, publication bias)                                                                    | Pages 30-31     |
| Justification for exclusion (eg, exclusion of non-English-language citations)                                             | Pages 11 and 12 |
| Assessment of quality of included studies                                                                                 | Pages 30-31     |
| <b>Reporting of conclusions should include</b>                                                                            |                 |
| Consideration of alternative explanations for observed results                                                            | Page 31-32      |
| Generalization of the conclusions (ie, appropriate for the data presented and within the domain of the literature review) | Page 31-32      |
| Guidelines for future research                                                                                            | Page 31-32      |
| Disclosure of funding source                                                                                              | Cover letter    |
