# Supplementary material
Source: PubMed Central journal article supplement (PMC5110386)
Supplement: NIHMS779959-supplement-5.pdf [file NIHMS779959-supplement-5.pdf]

## Document S2\_Publication Bias:

For each significant result of the main results (for each disorder and each sleep variable) we assessed publication bias graphically by using a funnel plot as well as quantitatively following the classical fail-safe number method (number of studies with no effect required to bring the p value to 0.05). Below publication bias assessments are reported.

### 1- Sleep Efficiency Index – Affective Disorders

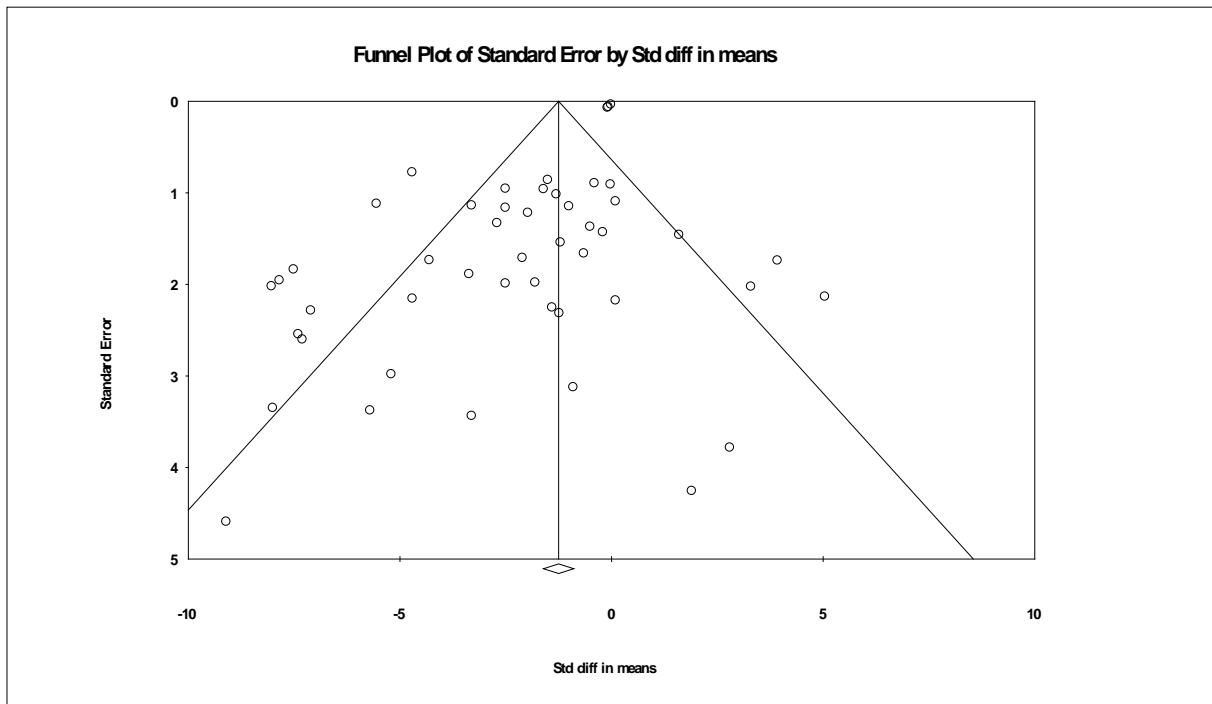

#### Classical fail-safe N:

|                                                                         |                   |
|-------------------------------------------------------------------------|-------------------|
| Z-Value for observed studies:                                           | -9,38231          |
| P-Value for observed studies:                                           | 0,00000           |
| Alpha                                                                   | 0,05000           |
| Tails                                                                   | 2,00000           |
| Z for alpha                                                             | 1,95996           |
| Number of observed studies                                              | 48,00000          |
| <b>Number of missing studies that would bring p-value to &gt; alpha</b> | <b>1052,00000</b> |

2- Sleep Efficiency Index – Major depression

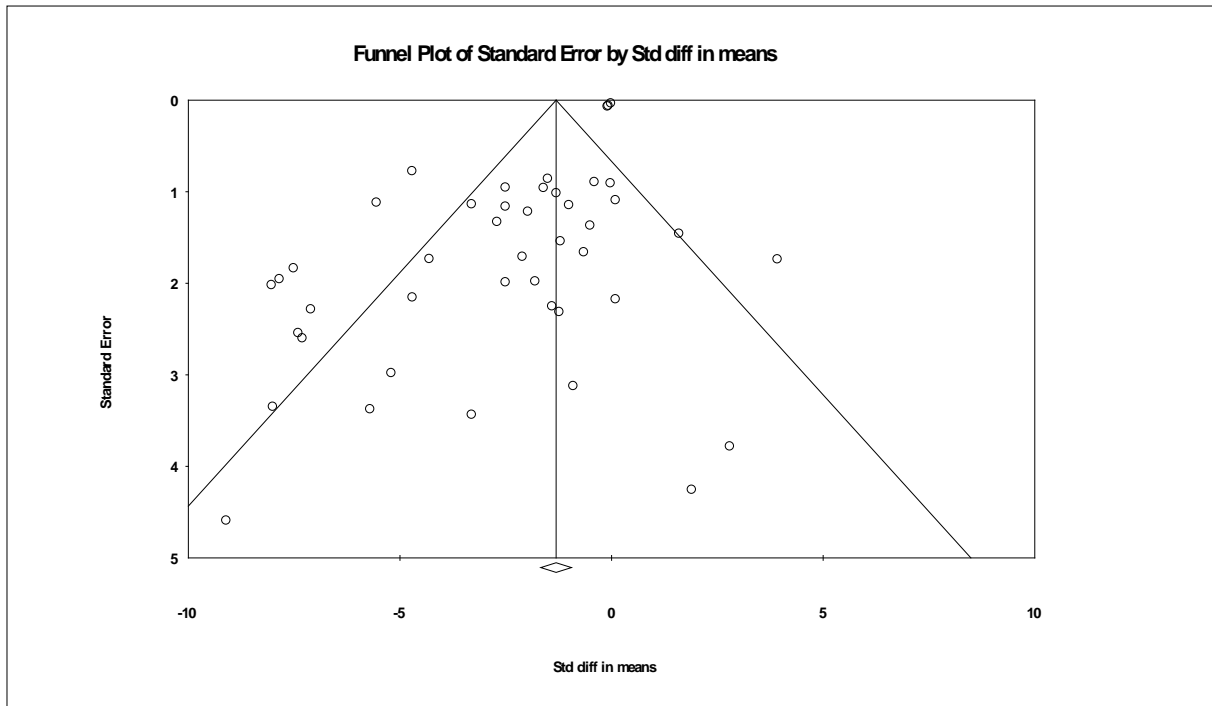

**Classical fail-safe N:**

|                                                                         |                  |
|-------------------------------------------------------------------------|------------------|
| Z-Value for observed studies:                                           | -10,1126         |
| P-Value for observed studies:                                           | 0,00000          |
| Alpha                                                                   | 0,05000          |
| Tails                                                                   | 2,00000          |
| Z for alpha                                                             | 1,95996          |
| Number of observed studies                                              | 44,00000         |
| <b>Number of missing studies that would bring p-value to &gt; alpha</b> | <b>1128,0000</b> |

### 3- Sleep Onset Latency – Affective Disorders

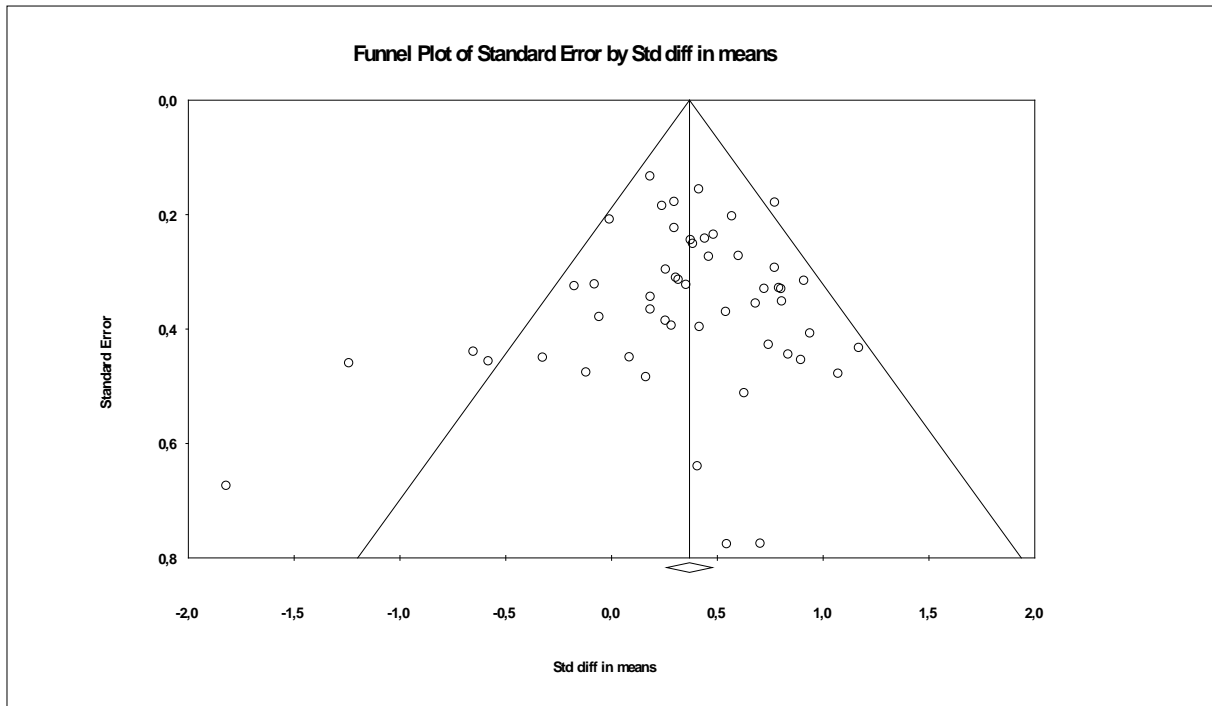

#### Classical fail-safe N:

|                                                                         |                  |
|-------------------------------------------------------------------------|------------------|
| Z-Value for observed studies:                                           | 8,14016          |
| P-Value for observed studies:                                           | 0,00000          |
| Alpha                                                                   | 0,05000          |
| Tails                                                                   | 2,00000          |
| Z for alpha                                                             | 1,95996          |
| Number of observed studies                                              | 52,00000         |
| <b>Number of missing studies that would bring p-value to &gt; alpha</b> | <b>845,00000</b> |

#### 4- Sleep Onset Latency – Major depression

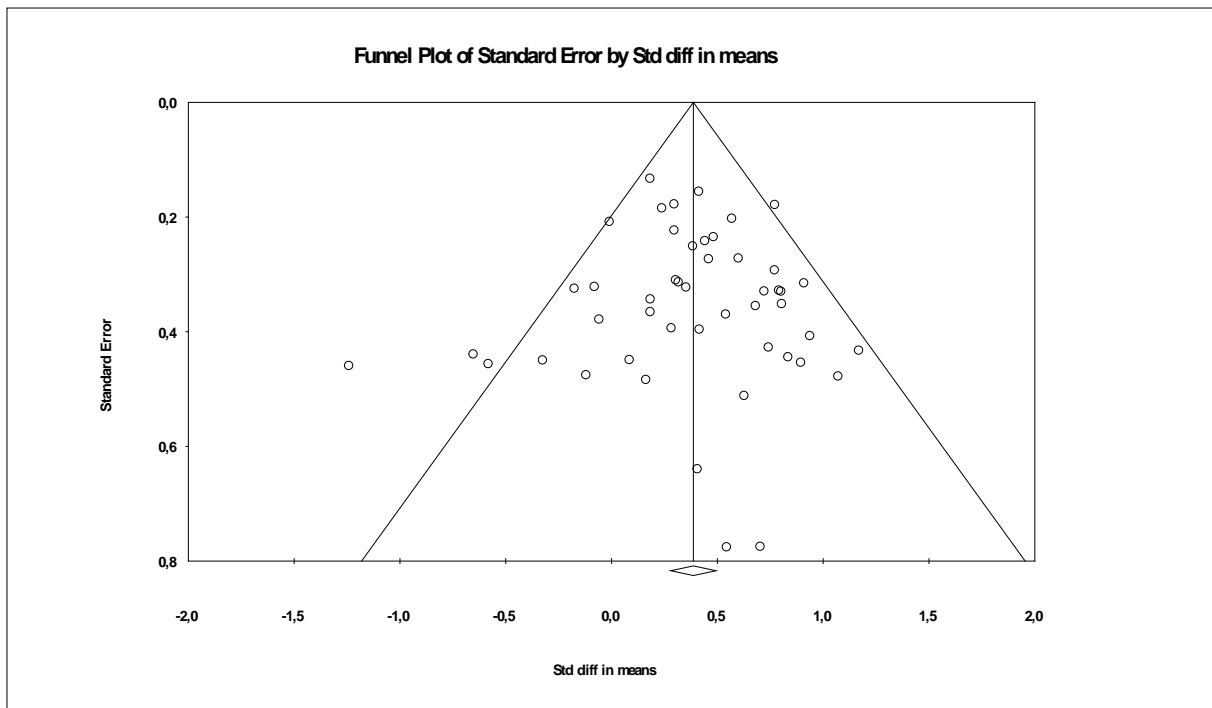

#### Classical fail-safe N:

|                                                                         |                  |
|-------------------------------------------------------------------------|------------------|
| Z-Value for observed studies:                                           | 8,14983          |
| P-Value for observed studies:                                           | 0,00000          |
| Alpha                                                                   | 0,05000          |
| Tails                                                                   | 2,00000          |
| Z for alpha                                                             | 1,95996          |
| Number of observed studies                                              | 48,00000         |
| <b>Number of missing studies that would bring p-value to &gt; alpha</b> | <b>838,00000</b> |

5- Total Sleep Time – Affective Disorders

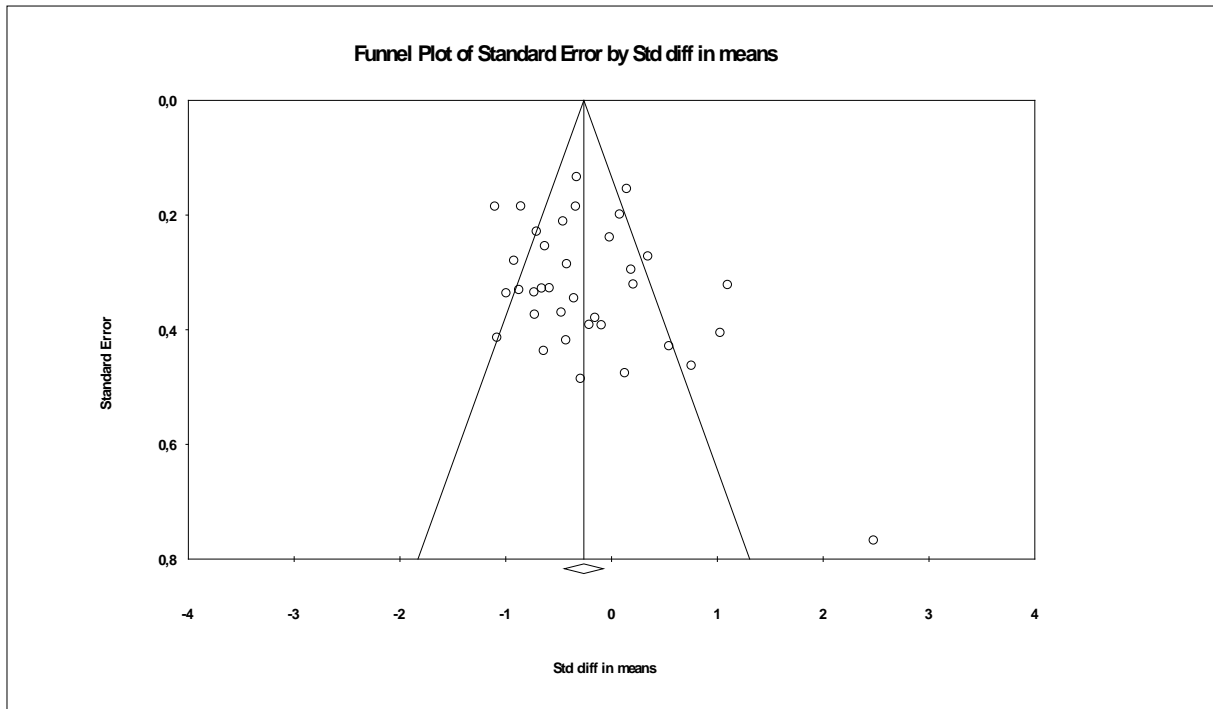

**Classical fail-safe N:**

|                                                                         |                  |
|-------------------------------------------------------------------------|------------------|
| Z-Value for observed studies:                                           | -5,61652         |
| P-Value for observed studies:                                           | 0,00000          |
| Alpha                                                                   | 0,05000          |
| Tails                                                                   | 2,00000          |
| Z for alpha                                                             | 1,95996          |
| Number of observed studies                                              | 36,00000         |
| <b>Number of missing studies that would bring p-value to &gt; alpha</b> | <b>260,00000</b> |

6- Total Sleep Time – Major depression

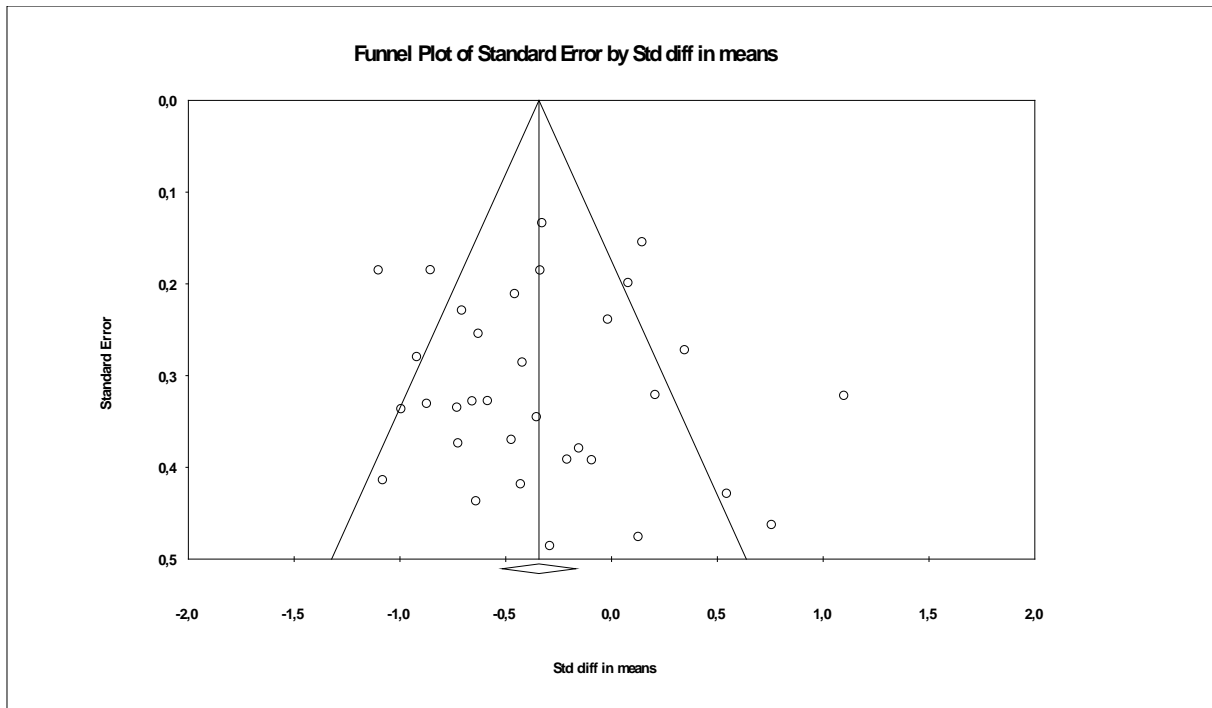

**Classical fail-safe N:**

|                                                                         |                  |
|-------------------------------------------------------------------------|------------------|
| Z-Value for observed studies:                                           | -6,98057         |
| P-Value for observed studies:                                           | 0,00000          |
| Alpha                                                                   | 0,05000          |
| Tails                                                                   | 2,00000          |
| Z for alpha                                                             | 1,95996          |
| Number of observed studies                                              | 33,00000         |
| <b>Number of missing studies that would bring p-value to &gt; alpha</b> | <b>386,00000</b> |

### 7- *Number of Awakenings – Affective Disorders/Major depression*

(All studies in affective disorders category reporting number of awakenings included patients with major depression)

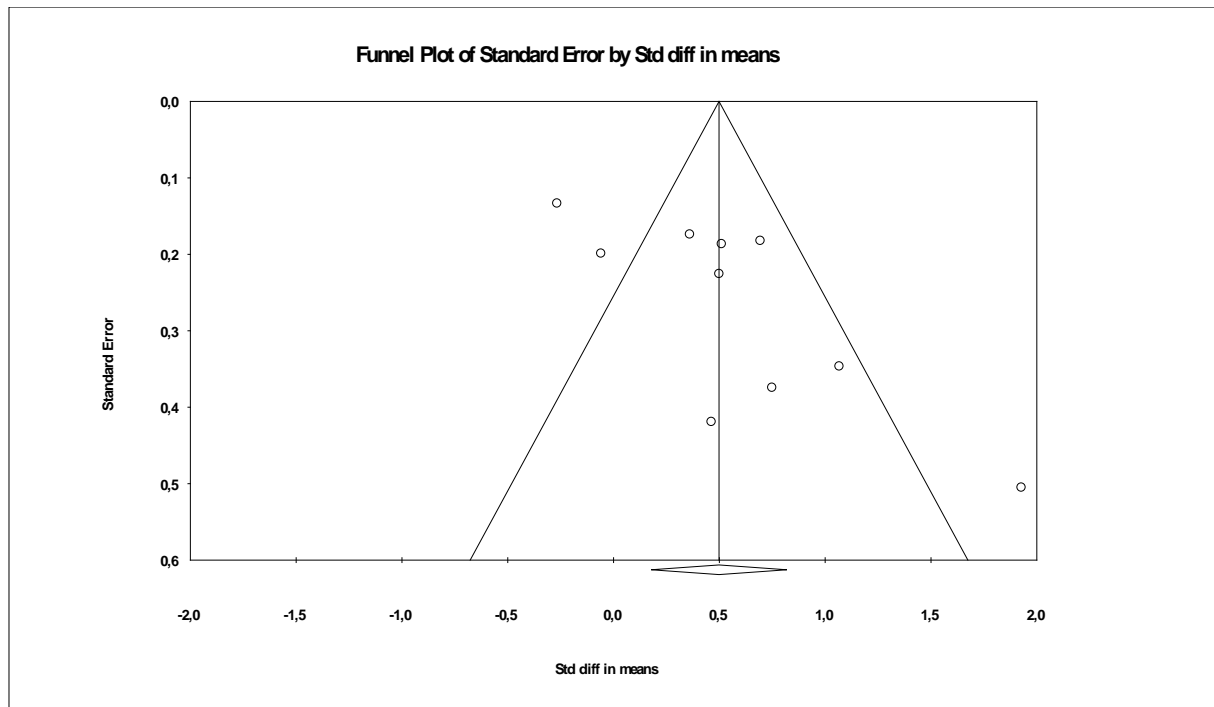

#### Classical fail-safe N:

|                                                                         |                 |
|-------------------------------------------------------------------------|-----------------|
| Z-Value for observed studies:                                           | 5,87166         |
| P-Value for observed studies:                                           | 0,00000         |
| Alpha                                                                   | 0,05000         |
| Tails                                                                   | 2,00000         |
| Z for alpha                                                             | 1,95996         |
| Number of observed studies                                              | 10,00000        |
| <b>Number of missing studies that would bring p-value to &gt; alpha</b> | <b>80,00000</b> |

**8- Total time awake during the night – Affective Disorders/Major depression**

(All studies in affective disorders category reporting total time awake during the night included patients with major depression)

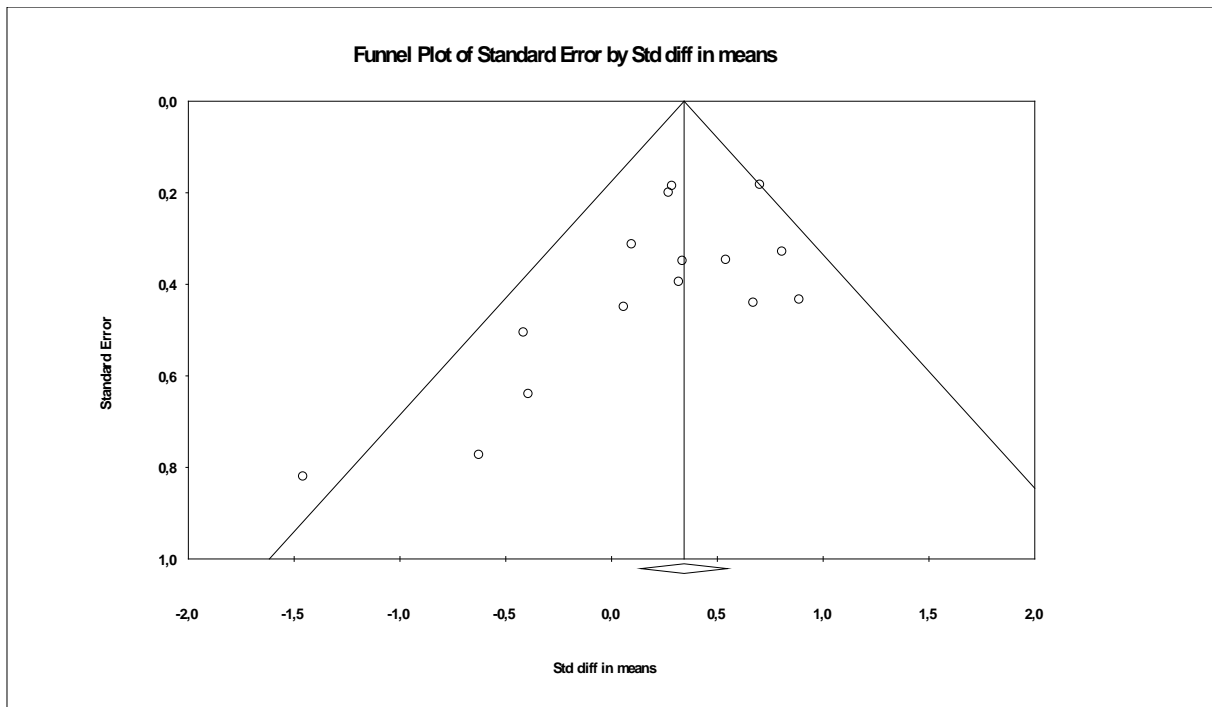

**Classical fail-safe N:**

|                                                                         |                 |
|-------------------------------------------------------------------------|-----------------|
| Z-Value for observed studies:                                           | 3,23264         |
| P-Value for observed studies:                                           | 0,00123         |
| Alpha                                                                   | 0,05000         |
| Tails                                                                   | 2,00000         |
| Z for alpha                                                             | 1,95996         |
| Number of observed studies                                              | 15,00000        |
| <b>Number of missing studies that would bring p-value to &gt; alpha</b> | <b>26,00000</b> |



9- REM Latency – Affective Disorders

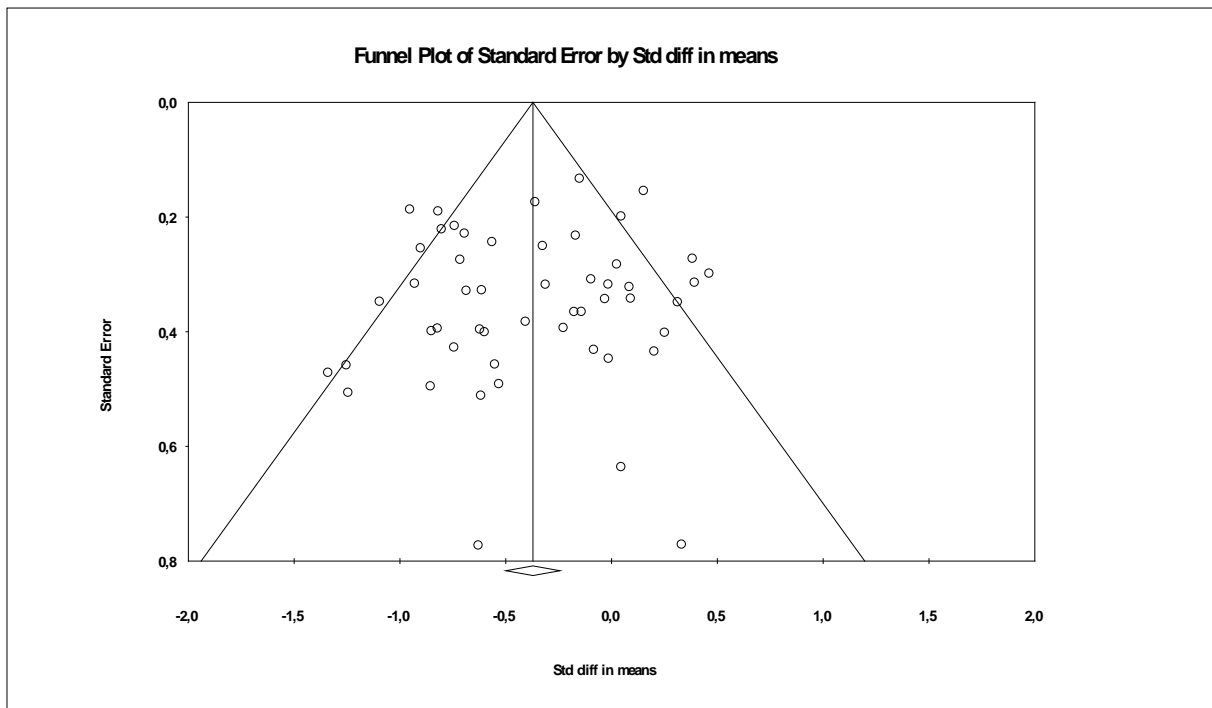

**Classical fail-safe N:**

|                                                                         |                  |
|-------------------------------------------------------------------------|------------------|
| Z-Value for observed studies:                                           | -8,56992         |
| P-Value for observed studies:                                           | 0,00000          |
| Alpha                                                                   | 0,05000          |
| Tails                                                                   | 2,00000          |
| Z for alpha                                                             | 1,95996          |
| Number of observed studies                                              | 52,00000         |
| <b>Number of missing studies that would bring p-value to &gt; alpha</b> | <b>943,00000</b> |

10- REM Latency – Major depression

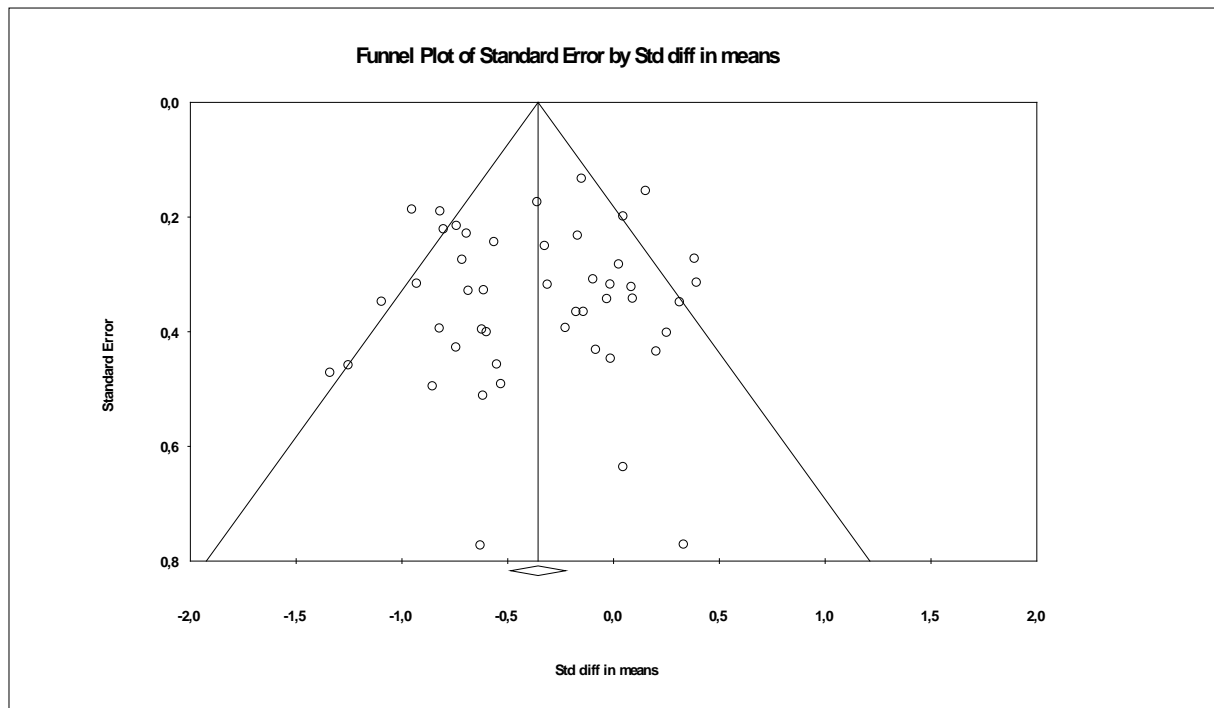

**Classical fail-safe N:**

|                                                                         |                  |
|-------------------------------------------------------------------------|------------------|
| Z-Value for observed studies:                                           | -7,90079         |
| P-Value for observed studies:                                           | 0,00000          |
| Alpha                                                                   | 0,05000          |
| Tails                                                                   | 2,00000          |
| Z for alpha                                                             | 1,95996          |
| Number of observed studies                                              | 47,00000         |
| <b>Number of missing studies that would bring p-value to &gt; alpha</b> | <b>717,00000</b> |

11- REM Density – Affective Disorders

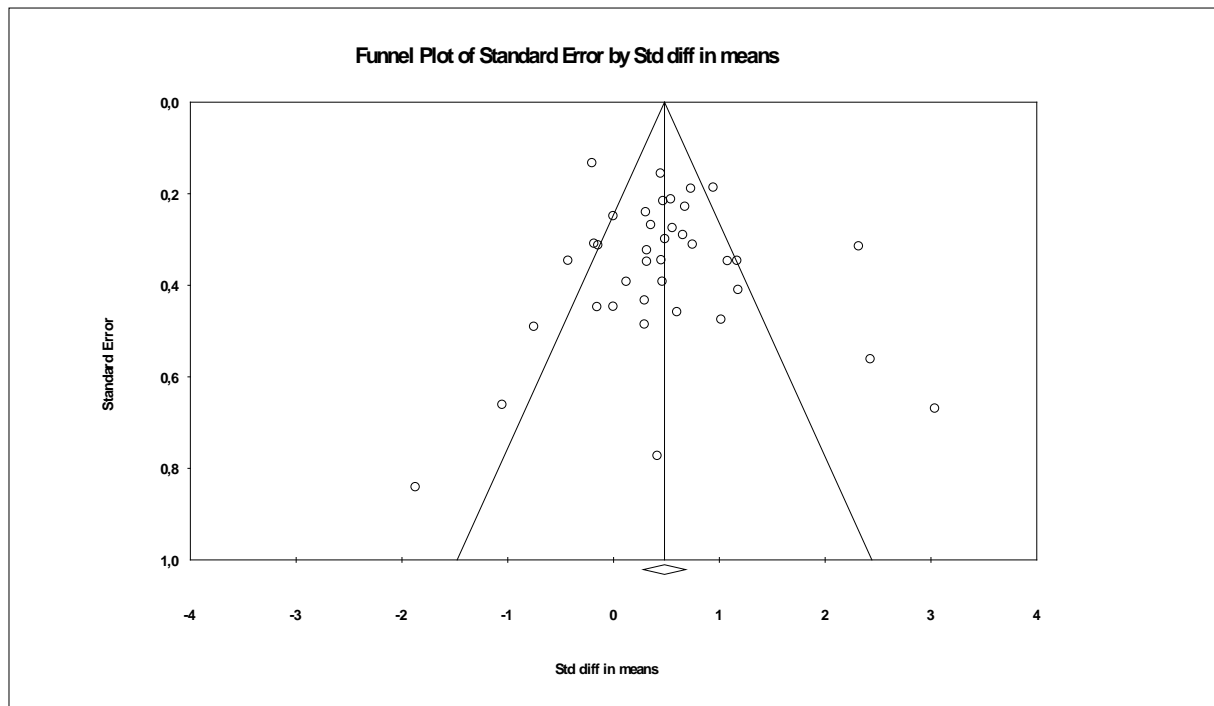

**Classical fail-safe N:**

|                                                                         |                  |
|-------------------------------------------------------------------------|------------------|
| Z-Value for observed studies:                                           | 9,17741          |
| P-Value for observed studies:                                           | 0,00000          |
| Alpha                                                                   | 0,05000          |
| Tails                                                                   | 2,00000          |
| Z for alpha                                                             | 1,95996          |
| Number of observed studies                                              | 38,00000         |
| <b>Number of missing studies that would bring p-value to &gt; alpha</b> | <b>796,00000</b> |

12- REM Density – Major depression

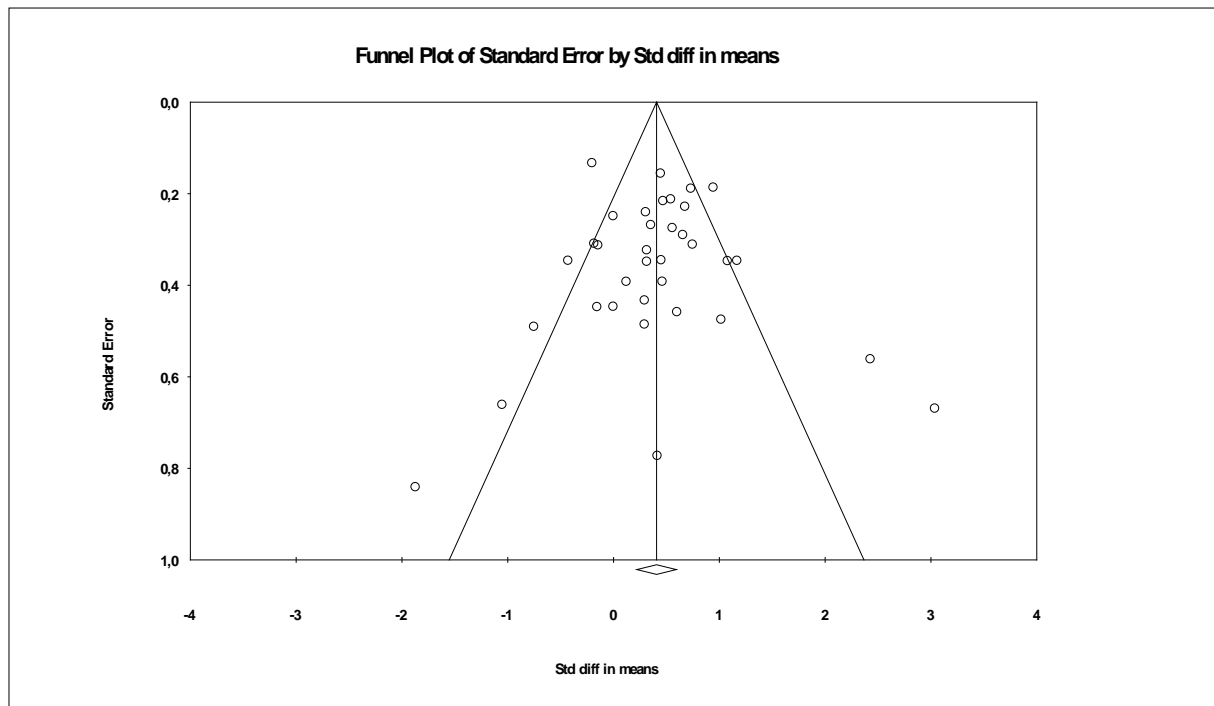

**Classical fail-safe N:**

|                                                                         |                  |
|-------------------------------------------------------------------------|------------------|
| Z-Value for observed studies:                                           | 7,55642          |
| P-Value for observed studies:                                           | 0,00000          |
| Alpha                                                                   | 0,05000          |
| Tails                                                                   | 2,00000          |
| Z for alpha                                                             | 1,95996          |
| Number of observed studies                                              | 35,00000         |
| <b>Number of missing studies that would bring p-value to &gt; alpha</b> | <b>486,00000</b> |

13- Duration of stage 1 sleep (%) – Affective Disorders

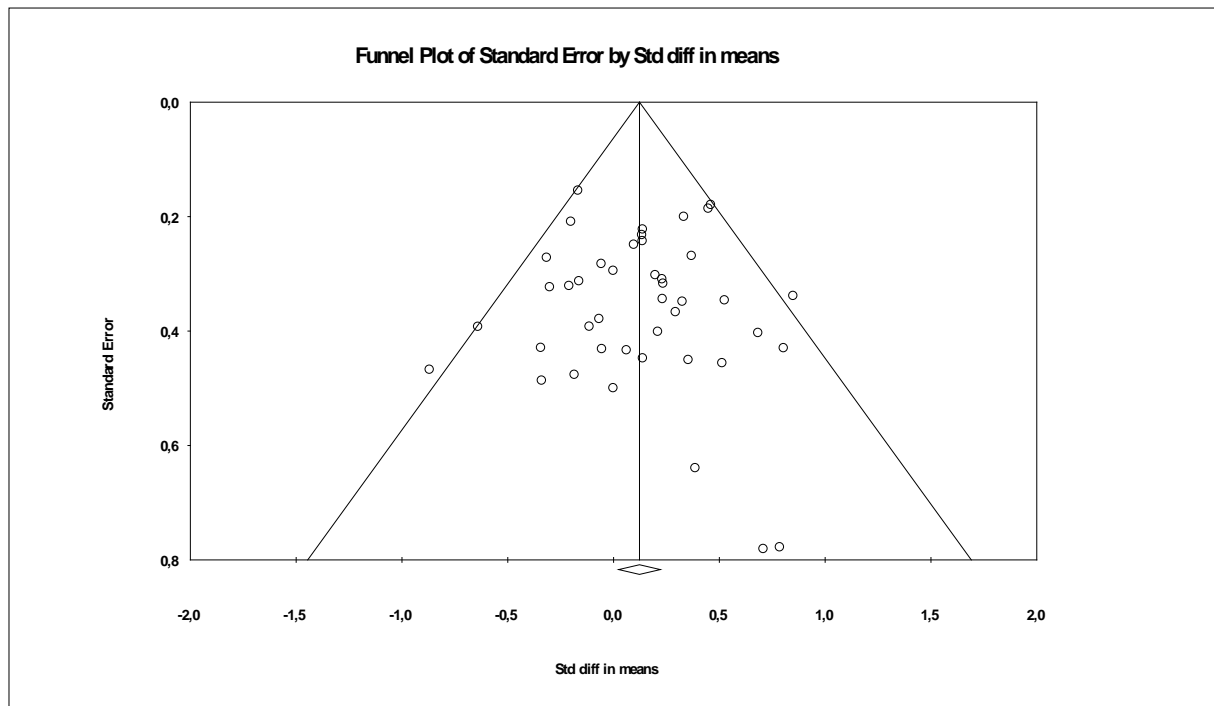

**Classical fail-safe N:**

Z-Value for observed studies: 2,48916

P-Value for observed studies: 0,01280

Alpha 0,05000

Tails 2,00000

Z for alpha 1,95996

Number of observed studies 43,00000

**Number of missing studies that would bring p-value to > alpha 27,00000**

14- Duration of stage 2 sleep (%) – Affective Disorders

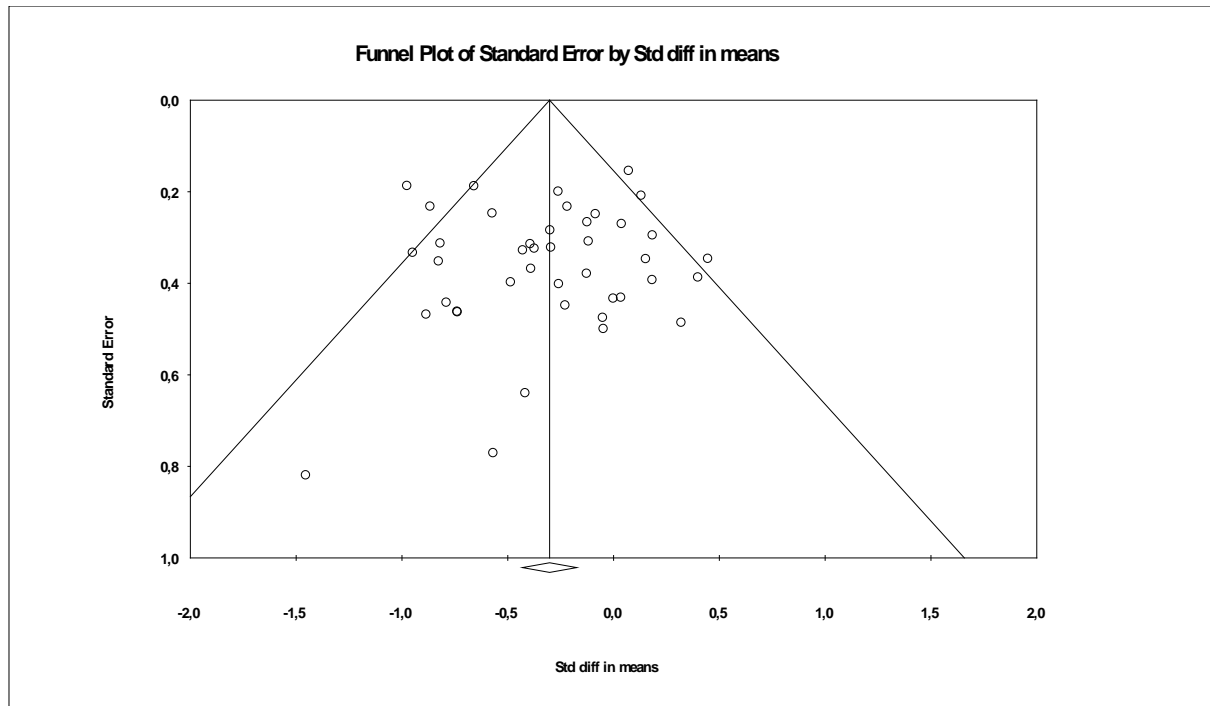

**Classical fail-safe N:**

|                                                                         |                  |
|-------------------------------------------------------------------------|------------------|
| Z-Value for observed studies:                                           | -6,12569         |
| P-Value for observed studies:                                           | 0,00000          |
| Alpha                                                                   | 0,05000          |
| Tails                                                                   | 2,00000          |
| Z for alpha                                                             | 1,95996          |
| Number of observed studies                                              | 42,00000         |
| <b>Number of missing studies that would bring p-value to &gt; alpha</b> | <b>369,00000</b> |

15- Duration of stage 2 sleep (%) – Major depression

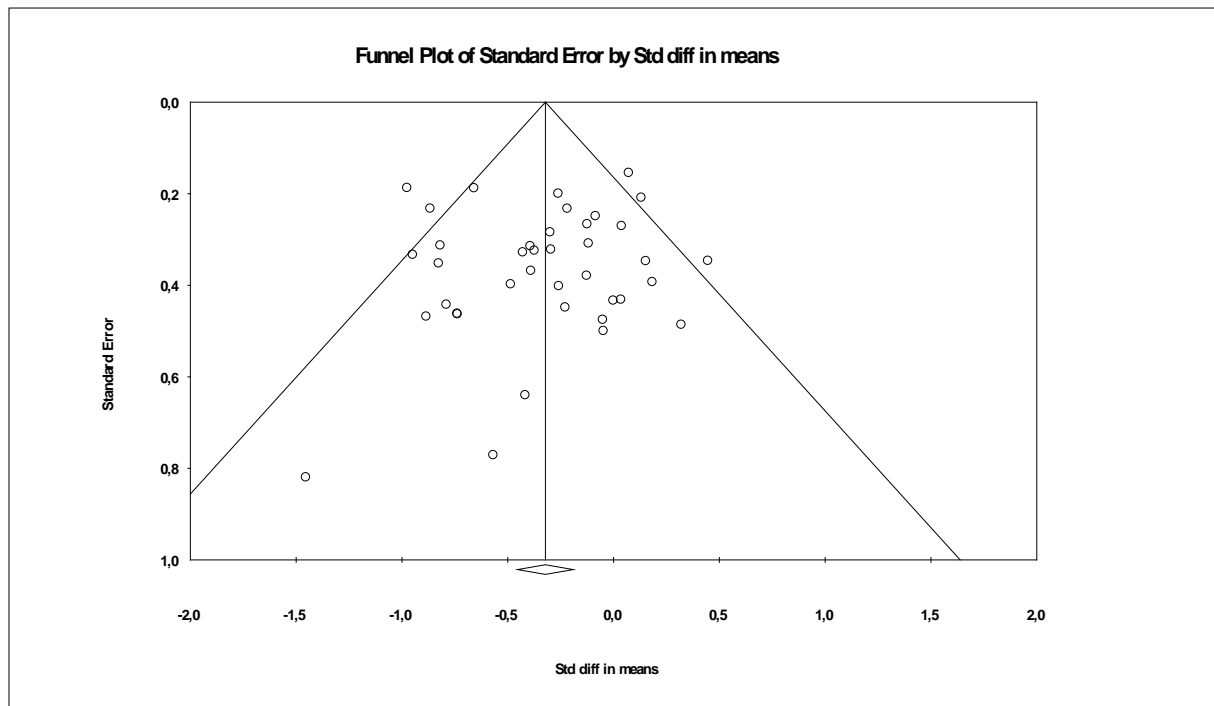

**Classical fail-safe N:**

|                                                                         |                  |
|-------------------------------------------------------------------------|------------------|
| Z-Value for observed studies:                                           | -6,25287         |
| P-Value for observed studies:                                           | 0,00000          |
| Alpha                                                                   | 0,05000          |
| Tails                                                                   | 2,00000          |
| Z for alpha                                                             | 1,95996          |
| Number of observed studies                                              | 42,00000         |
| <b>Number of missing studies that would bring p-value to &gt; alpha</b> | <b>39,000000</b> |

16- Duration of REM sleep (%) – Affective Disorders

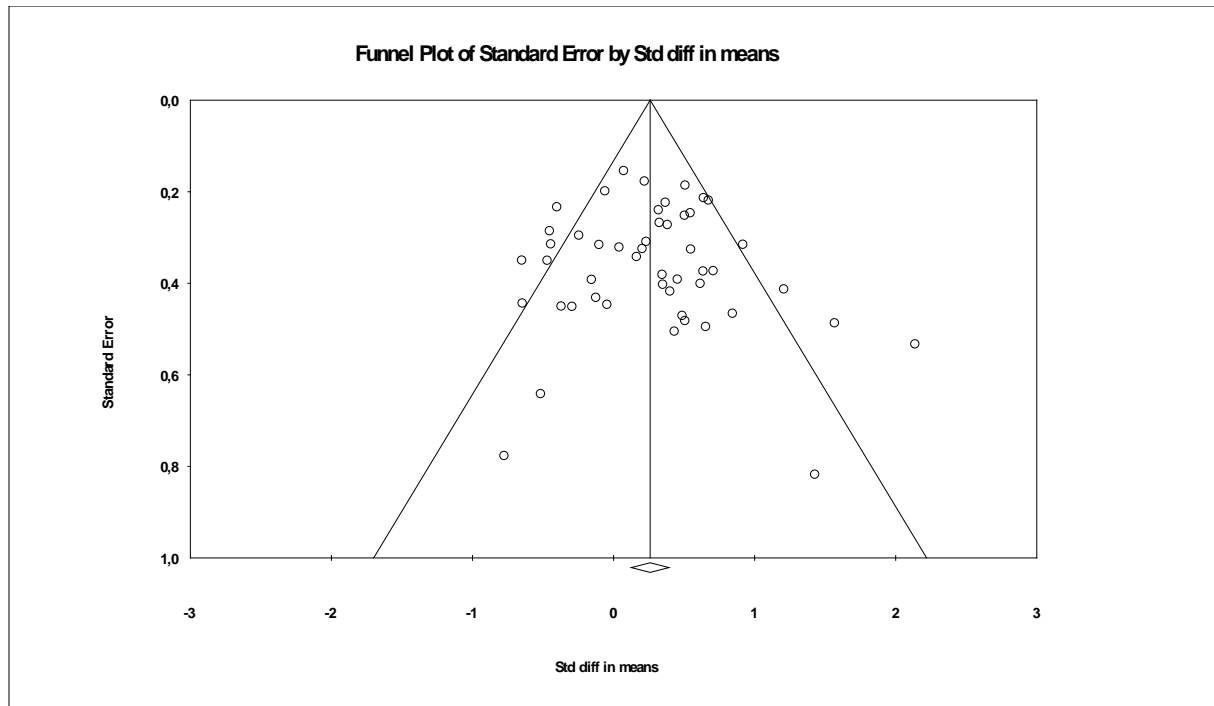

**Classical fail-safe N:**

Z-Value for observed studies: 5,60979

P-Value for observed studies: 0,00000

Alpha 0,05000

Tails 2,00000

Z for alpha 1,95996

Number of observed studies 49,00000

**Number of missing studies that would bring p-value to > alpha 353,000000**



17- Duration of REM sleep (%) – Major depression

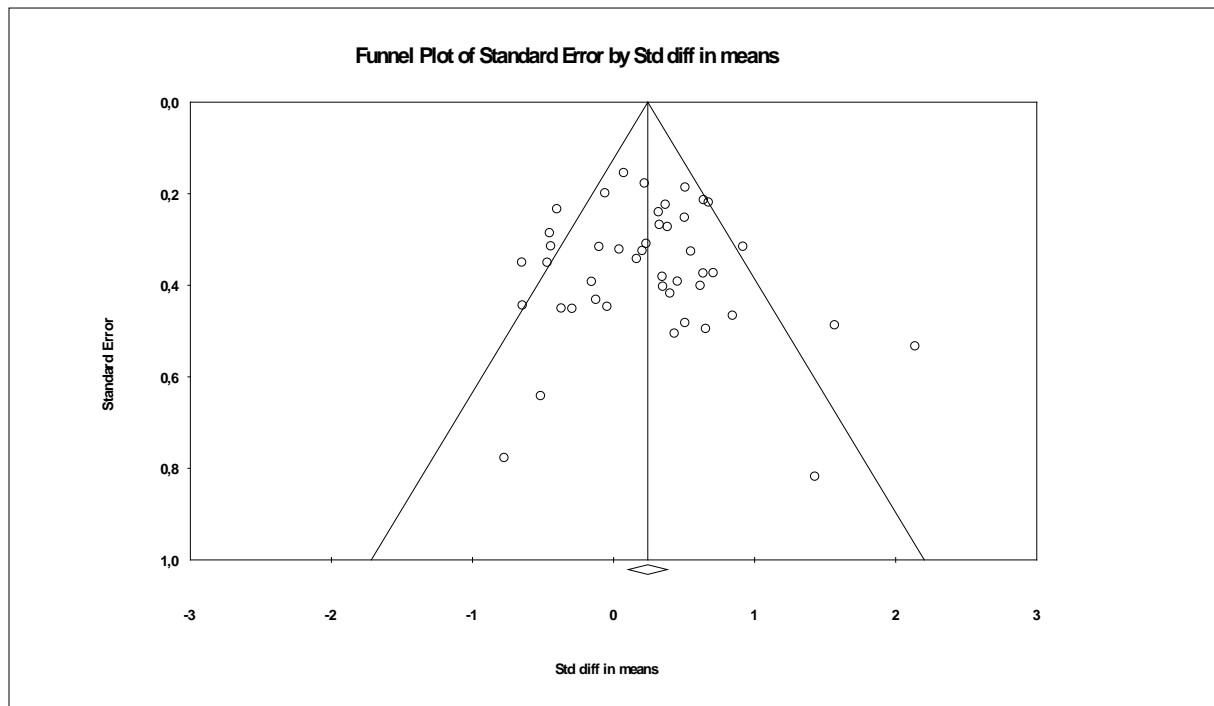

**Classical fail-safe N:**

|                                                                         |                   |
|-------------------------------------------------------------------------|-------------------|
| Z-Value for observed studies:                                           | 5,05523           |
| P-Value for observed studies:                                           | 0,00000           |
| Alpha                                                                   | 0,05000           |
| Tails                                                                   | 2,00000           |
| Z for alpha                                                             | 1,95996           |
| Number of observed studies                                              | 45,00000          |
| <b>Number of missing studies that would bring p-value to &gt; alpha</b> | <b>255,000000</b> |

18- Sleep Efficiency Index – Anxiety Disorder

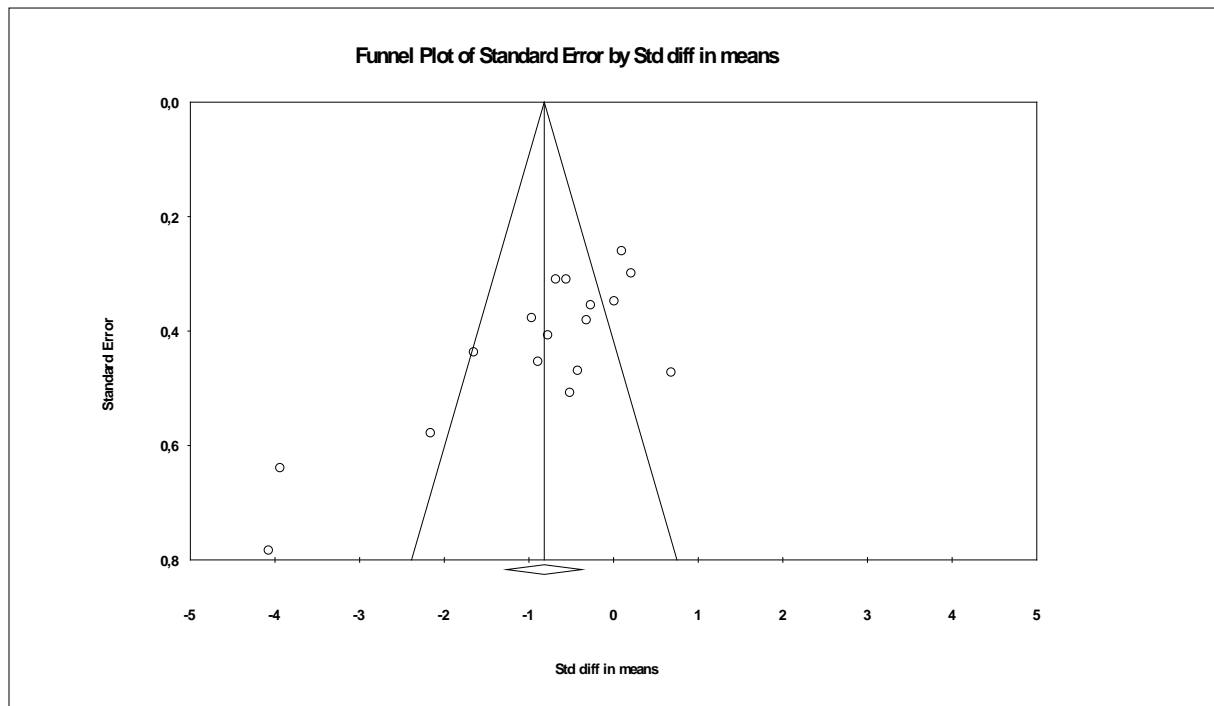

**Classical fail-safe N:**

|                                                                         |                   |
|-------------------------------------------------------------------------|-------------------|
| Z-Value for observed studies:                                           | -7,30839          |
| P-Value for observed studies:                                           | 0,00000           |
| Alpha                                                                   | 0,05000           |
| Tails                                                                   | 2,00000           |
| Z for alpha                                                             | 1,95996           |
| Number of observed studies                                              | 17,00000          |
| <b>Number of missing studies that would bring p-value to &gt; alpha</b> | <b>220,000000</b> |

19- Sleep Efficiency Index – PTSD

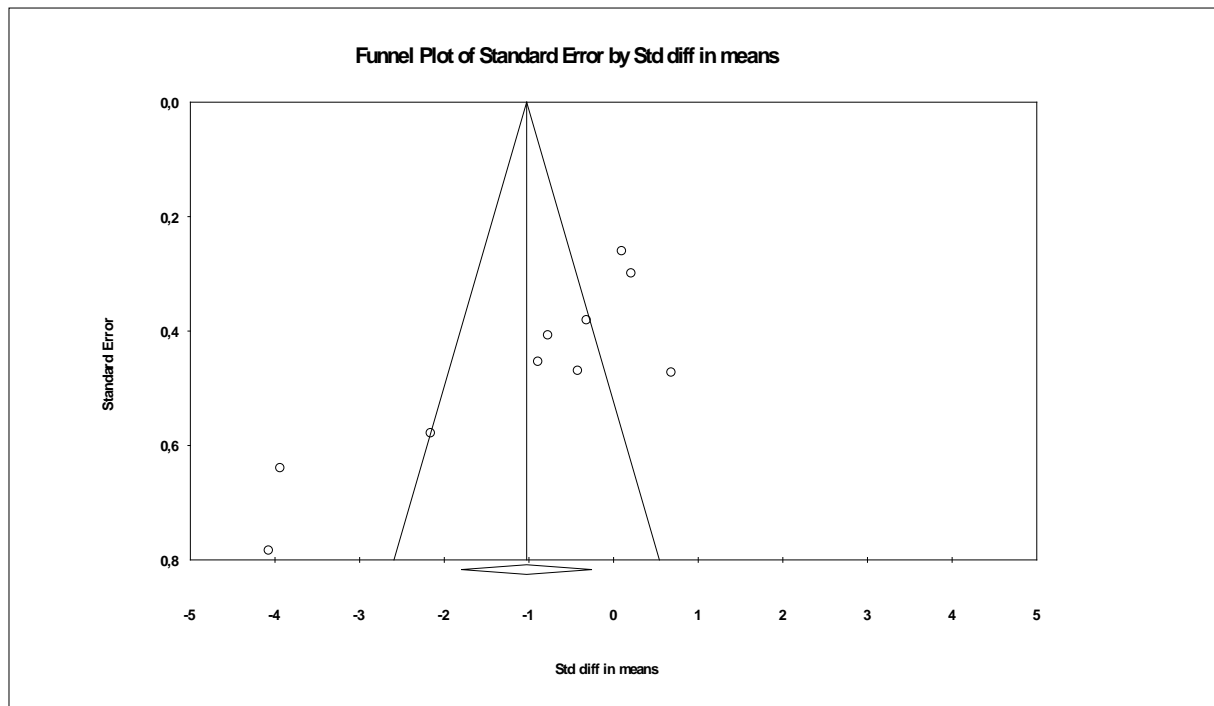

**Classical fail-safe N:**

|                                                                         |                  |
|-------------------------------------------------------------------------|------------------|
| Z-Value for observed studies:                                           | -5,72745         |
| P-Value for observed studies:                                           | 0,00000          |
| Alpha                                                                   | 0,05000          |
| Tails                                                                   | 2,00000          |
| Z for alpha                                                             | 1,95996          |
| Number of observed studies                                              | 10,00000         |
| <b>Number of missing studies that would bring p-value to &gt; alpha</b> | <b>76,000000</b> |

*20- Sleep Efficiency Index – Panic disorder*

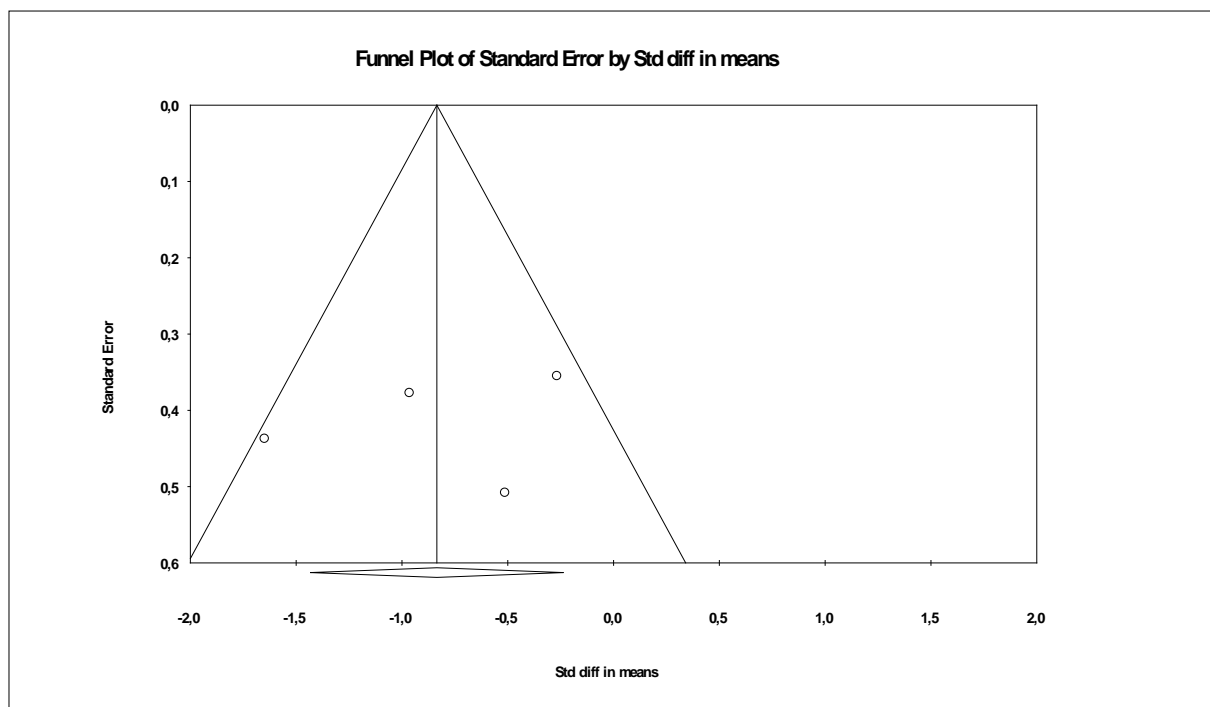

**Classical fail-safe N:**

|                                                                         |                  |
|-------------------------------------------------------------------------|------------------|
| Z-Value for observed studies:                                           | -403824          |
| P-Value for observed studies:                                           | 0,00005          |
| Alpha                                                                   | 0,05000          |
| Tails                                                                   | 2,00000          |
| Z for alpha                                                             | 1,95996          |
| Number of observed studies                                              | 4,00000          |
| <b>Number of missing studies that would bring p-value to &gt; alpha</b> | <b>13,000000</b> |

*21- Sleep Onset Latency – Anxiety Disorder*

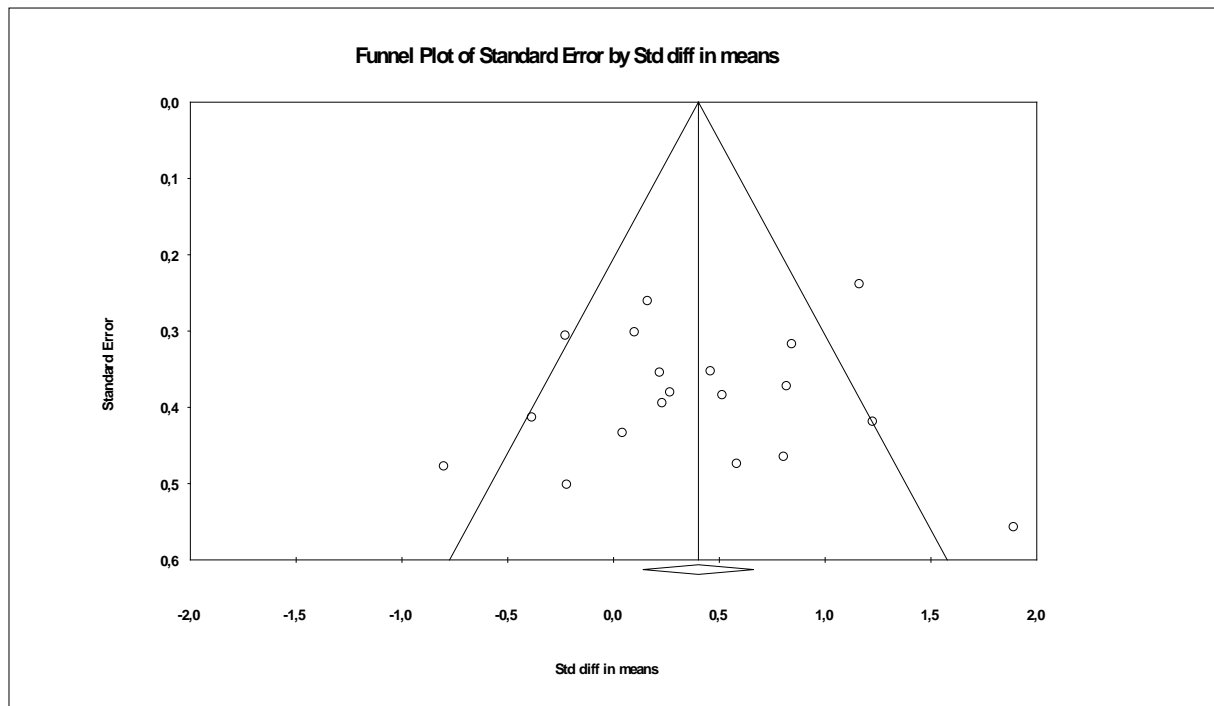

**Classical fail-safe N:**

|                                                                         |                  |
|-------------------------------------------------------------------------|------------------|
| Z-Value for observed studies:                                           | 4,77983          |
| P-Value for observed studies:                                           | 0,00000          |
| Alpha                                                                   | 0,05000          |
| Tails                                                                   | 2,00000          |
| Z for alpha                                                             | 1,95996          |
| Number of observed studies                                              | 19,00000         |
| <b>Number of missing studies that would bring p-value to &gt; alpha</b> | <b>95,000000</b> |

22- Total Sleep Time – Anxiety Disorder

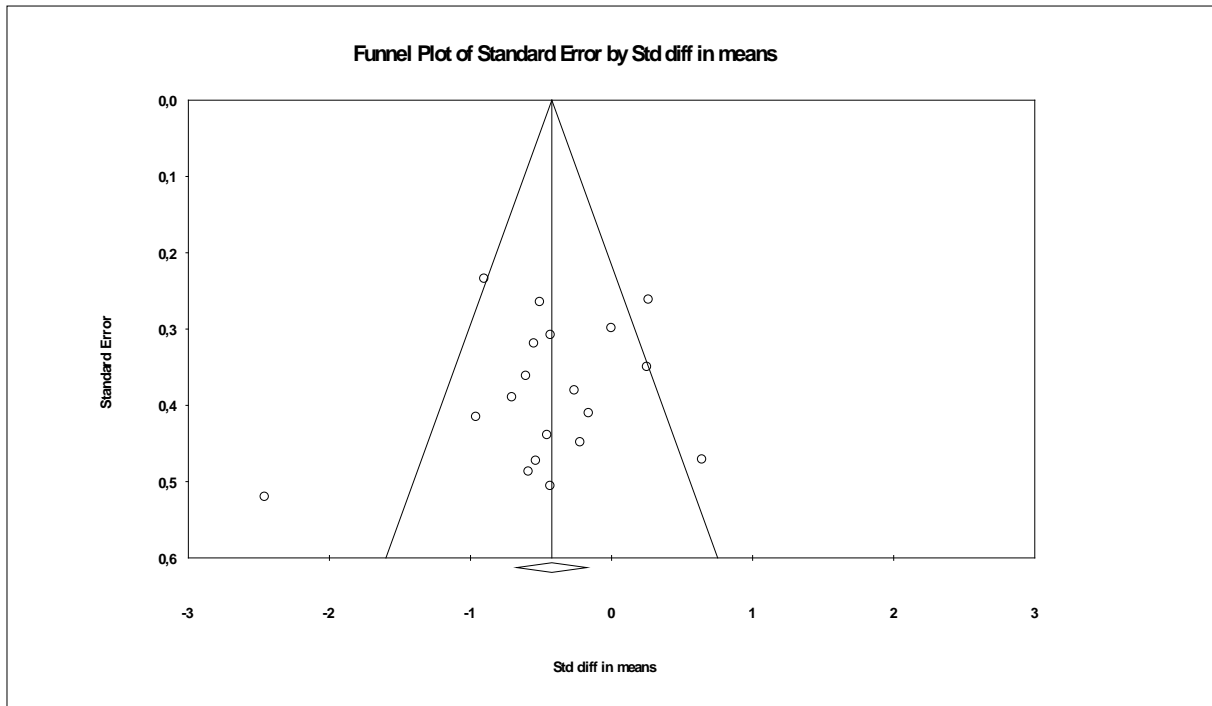

**Classical fail-safe N:**

|                                                                         |                  |
|-------------------------------------------------------------------------|------------------|
| Z-Value for observed studies:                                           | -5,07499         |
| P-Value for observed studies:                                           | 0,00000          |
| Alpha                                                                   | 0,05000          |
| Tails                                                                   | 2,00000          |
| Z for alpha                                                             | 1,95996          |
| Number of observed studies                                              | 19,00000         |
| <b>Number of missing studies that would bring p-value to &gt; alpha</b> | <b>109,00000</b> |

*23- Total Sleep Time – Panic disorder*

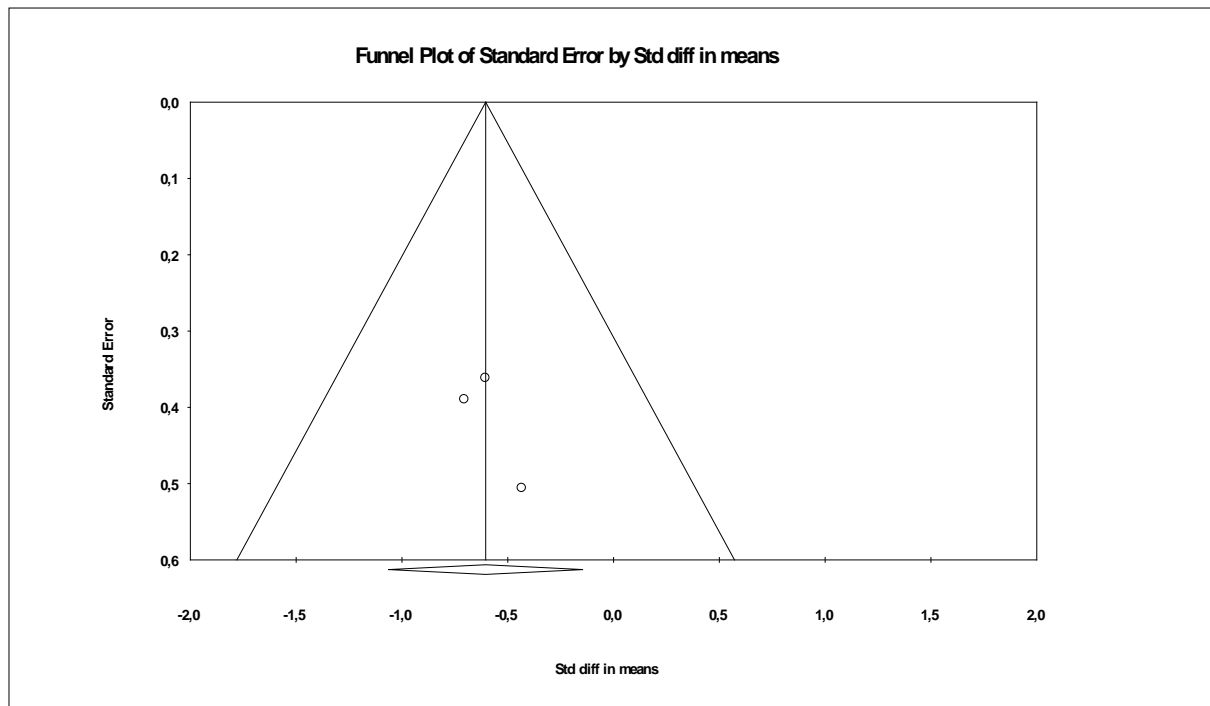

**Classical fail-safe N:**

|                                                                         |                |
|-------------------------------------------------------------------------|----------------|
| Z-Value for observed studies:                                           | -2,50541       |
| P-Value for observed studies:                                           | 0,01223        |
| Alpha                                                                   | 0,05000        |
| Tails                                                                   | 2,00000        |
| Z for alpha                                                             | 1,95996        |
| Number of observed studies                                              | 3,00000        |
| <b>Number of missing studies that would bring p-value to &gt; alpha</b> | <b>2,00000</b> |

*24- Total Sleep Time – PTSD*

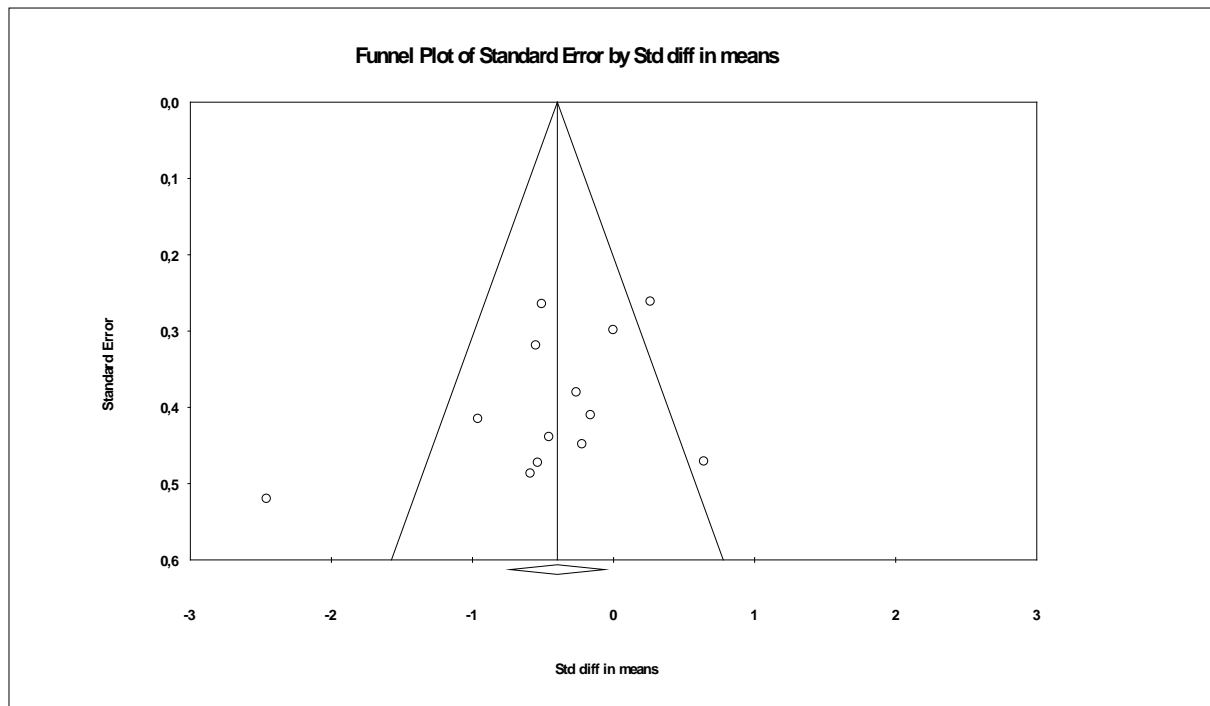

**Classical fail-safe N:**

|                                                                         |                 |
|-------------------------------------------------------------------------|-----------------|
| Z-Value for observed studies:                                           | -3,67523        |
| P-Value for observed studies:                                           | 0,00024         |
| Alpha                                                                   | 0,05000         |
| Tails                                                                   | 2,00000         |
| Z for alpha                                                             | 1,95996         |
| Number of observed studies                                              | 13,00000        |
| <b>Number of missing studies that would bring p-value to &gt; alpha</b> | <b>33,00000</b> |



25- Number of Awakenings – Anxiety Disorder

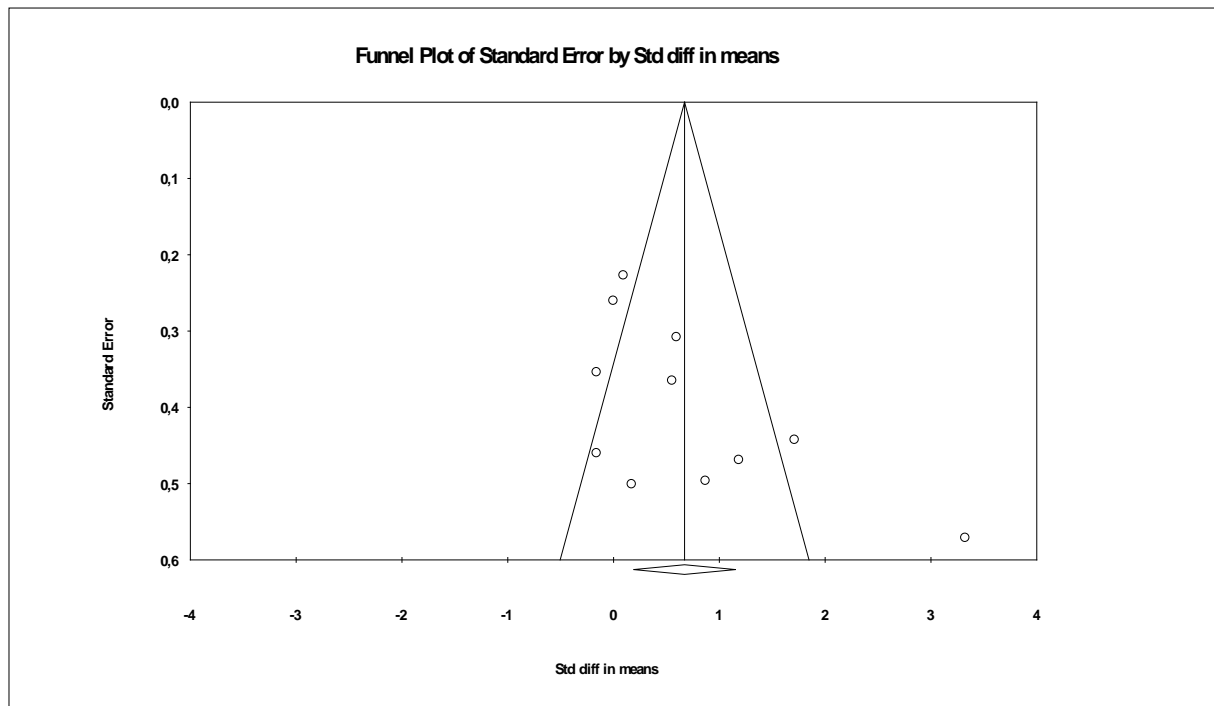

**Classical fail-safe N:**

Z-Value for observed studies: 5,24581

P-Value for observed studies: 0,00000

Alpha 0,05000

Tails 2,00000

Z for alpha 1,95996

Number of observed studies 11,00000

**Number of missing studies that would bring p-value to > alpha 68,00000**

*26- Number of Awakenings – PTSD*

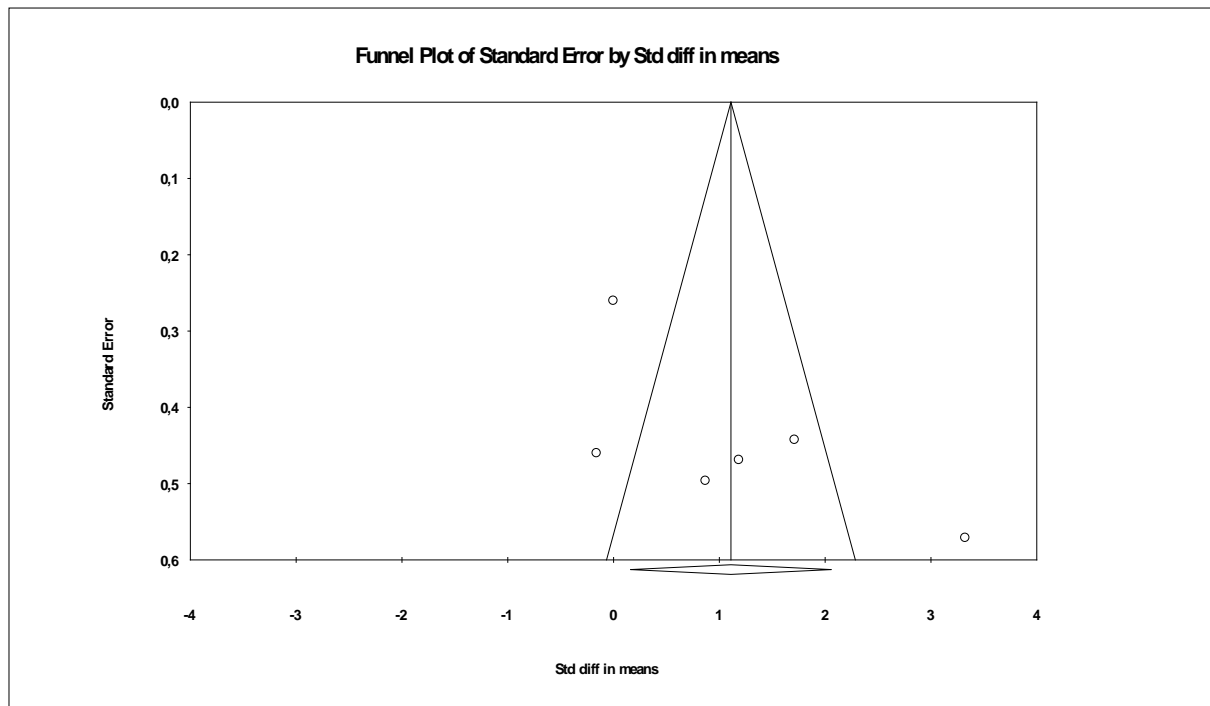

**Classical fail-safe N:**

|                                                                         |                 |
|-------------------------------------------------------------------------|-----------------|
| Z-Value for observed studies:                                           | 5,56323         |
| P-Value for observed studies:                                           | 0,00000         |
| Alpha                                                                   | 0,05000         |
| Tails                                                                   | 2,00000         |
| Z for alpha                                                             | 1,95996         |
| Number of observed studies                                              | 6,00000         |
| <b>Number of missing studies that would bring p-value to &gt; alpha</b> | <b>43,00000</b> |

*27- Total time awake during the night – Anxiety Disorder*

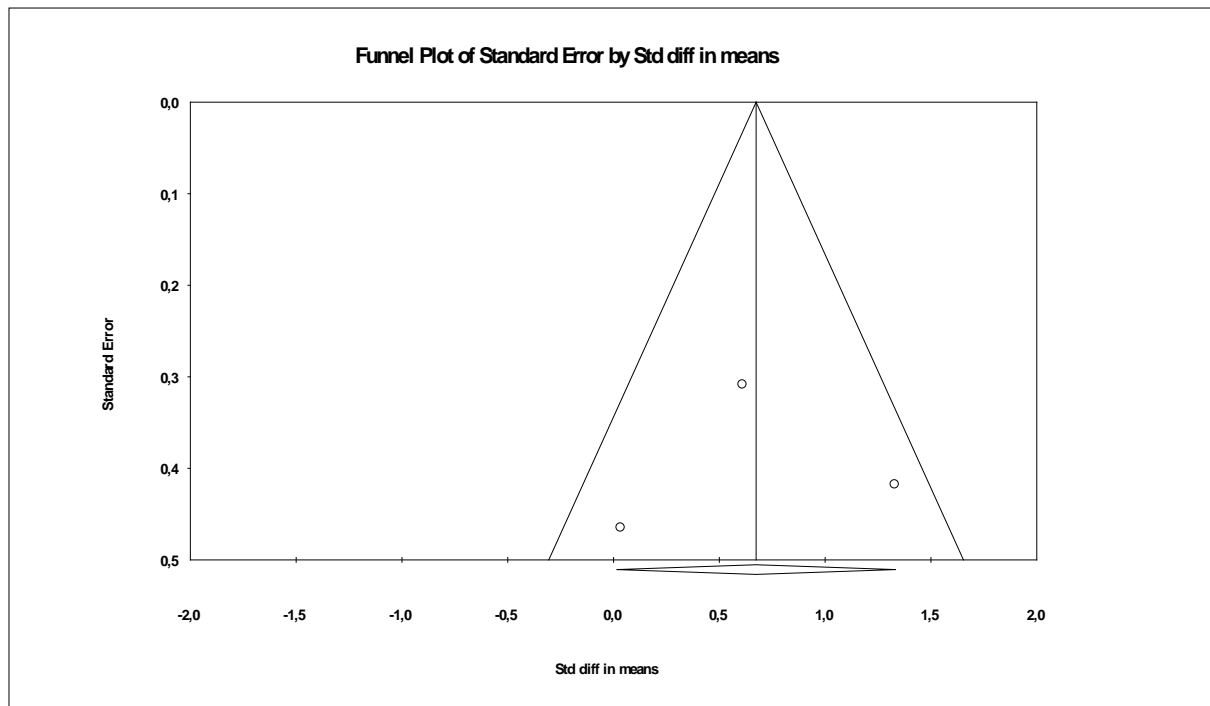

**Classical fail-safe N:**

|                                                                         |                |
|-------------------------------------------------------------------------|----------------|
| Z-Value for observed studies:                                           | 3,02075        |
| P-Value for observed studies:                                           | 0,00252        |
| Alpha                                                                   | 0,05000        |
| Tails                                                                   | 2,00000        |
| Z for alpha                                                             | 1,95996        |
| Number of observed studies                                              | 3,00000        |
| <b>Number of missing studies that would bring p-value to &gt; alpha</b> | <b>5,00000</b> |

*28- REM Latency – Anxiety Disorder*

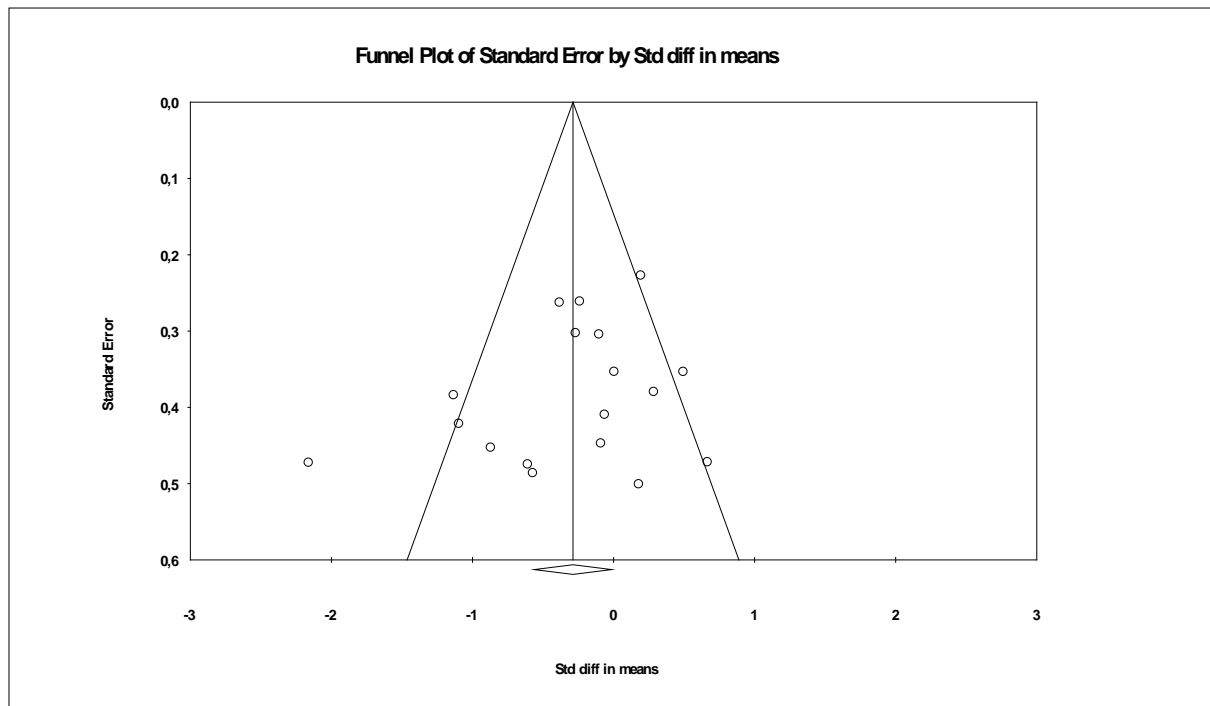

**Classical fail-safe N:**

Z-Value for observed studies: -3,20253

P-Value for observed studies: 0,00136

Alpha 0,05000

Tails 2,00000

Z for alpha 1,95996

Number of observed studies 18,00000

**Number of missing studies that would bring p-value to > alpha 31,00000**

29- REM Latency – PTSD

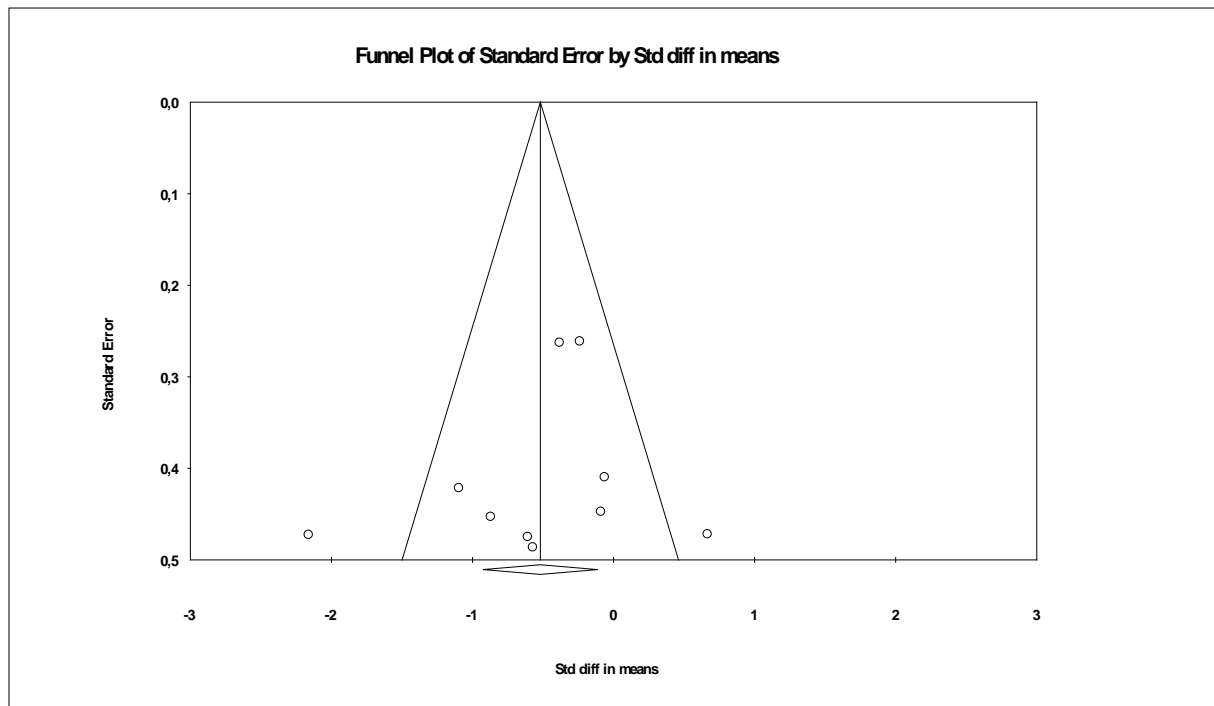

**Classical fail-safe N:**

|                                                                         |                 |
|-------------------------------------------------------------------------|-----------------|
| Z-Value for observed studies:                                           | -4,05594        |
| P-Value for observed studies:                                           | 0,00005         |
| Alpha                                                                   | 0,05000         |
| Tails                                                                   | 2,00000         |
| Z for alpha                                                             | 1,95996         |
| Number of observed studies                                              | 10,00000        |
| <b>Number of missing studies that would bring p-value to &gt; alpha</b> | <b>33,00000</b> |

30- REM Density – PTSD

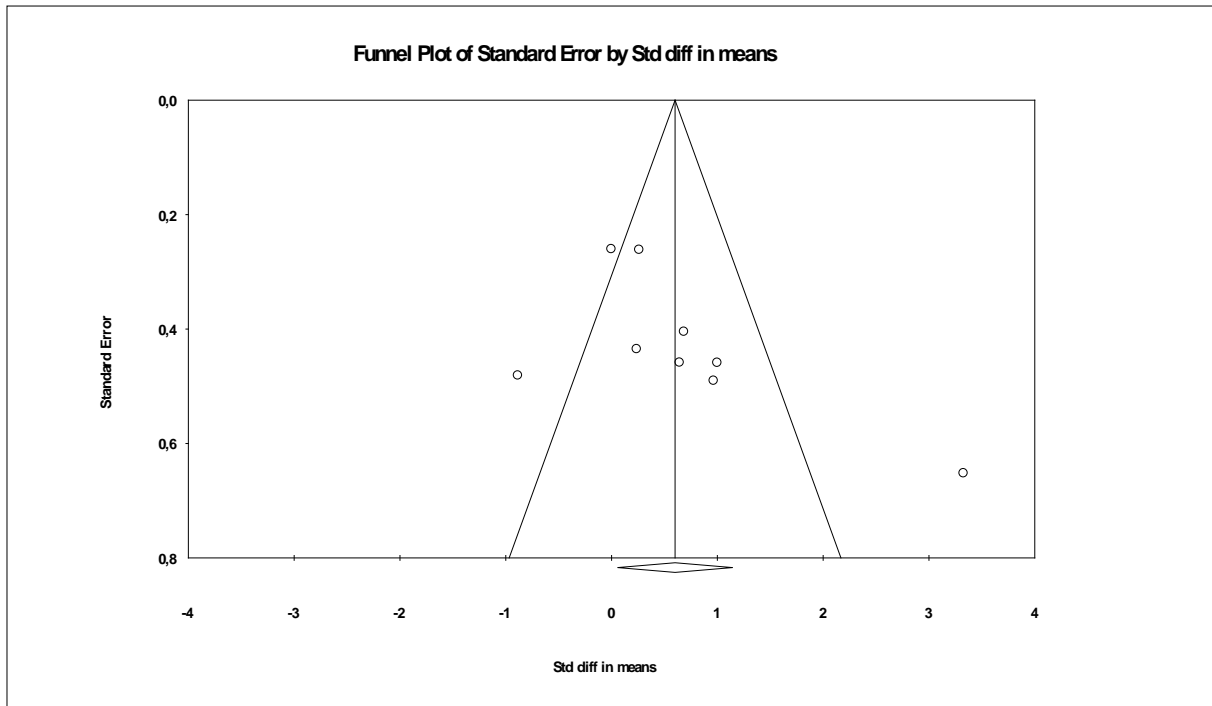

**Classical fail-safe N:**

|                                                                         |                 |
|-------------------------------------------------------------------------|-----------------|
| Z-Value for observed studies:                                           | 4,02434         |
| P-Value for observed studies:                                           | 0,00006         |
| Alpha                                                                   | 0,05000         |
| Tails                                                                   | 2,00000         |
| Z for alpha                                                             | 1,95996         |
| Number of observed studies                                              | 9,00000         |
| <b>Number of missing studies that would bring p-value to &gt; alpha</b> | <b>29,00000</b> |

31- Duration of SWS – Anxiety Disorder

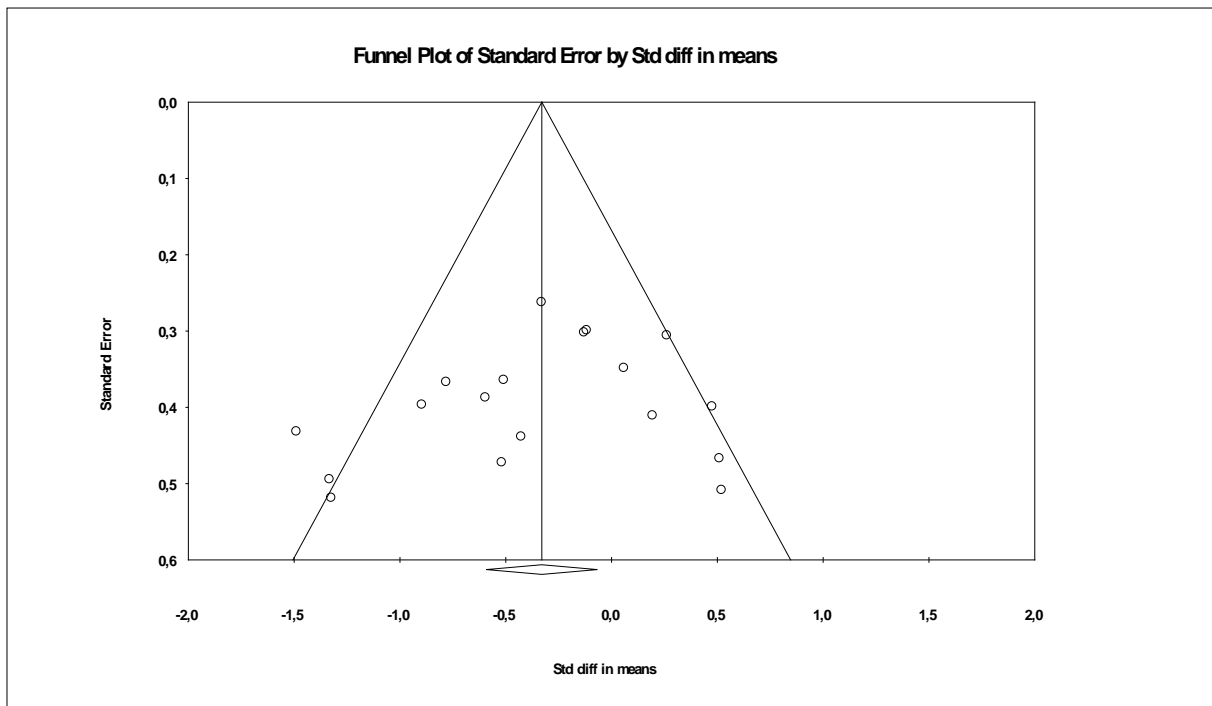

**Classical fail-safe N:**

Z-Value for observed studies: -3,62046

P-Value for observed studies: 0,00029

Alpha 0,05000

Tails 2,00000

Z for alpha 1,95996

Number of observed studies 18,00000

**Number of missing studies that would bring p-value to > alpha 44,00000**

32- Duration of SWS – PTSD

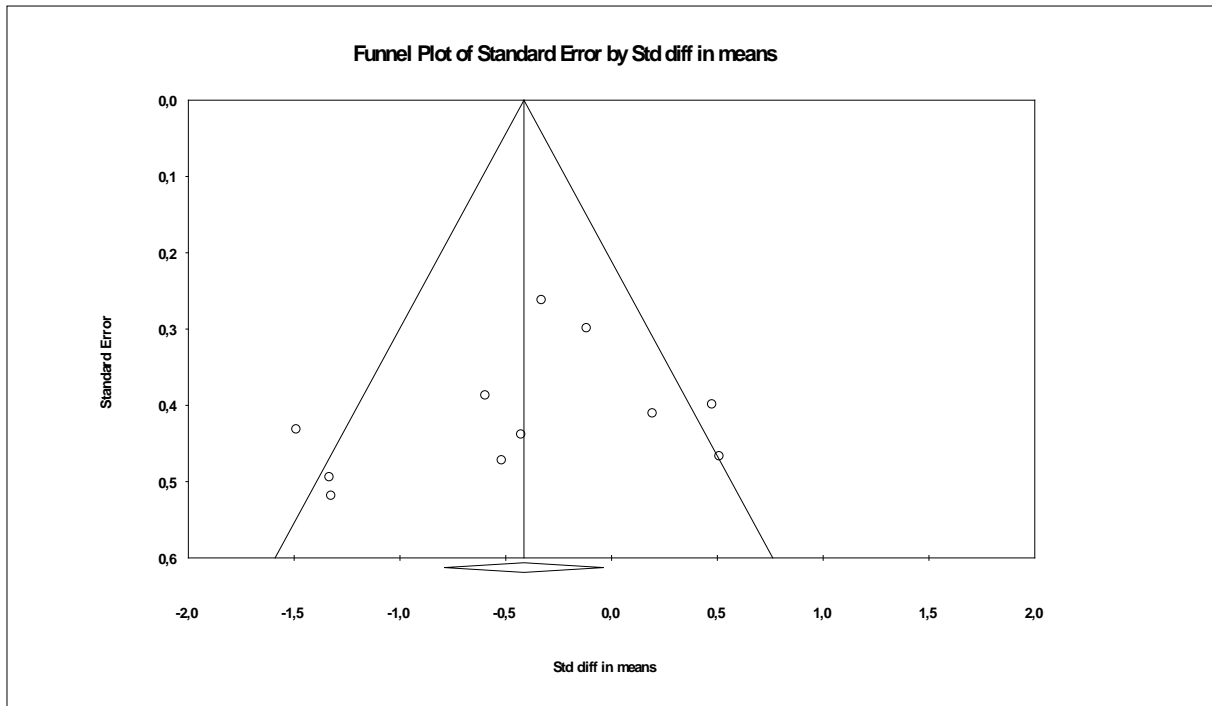

**Classical fail-safe N:**

Z-Value for observed studies: -3,37583

P-Value for observed studies: 0,00074

Alpha 0,05000

Tails 2,00000

Z for alpha 1,95996

Number of observed studies 11,00000

**Number of missing studies that would bring p-value to > alpha 22,00000**



### 33- Sleep Efficiency Index – Eating Disorders

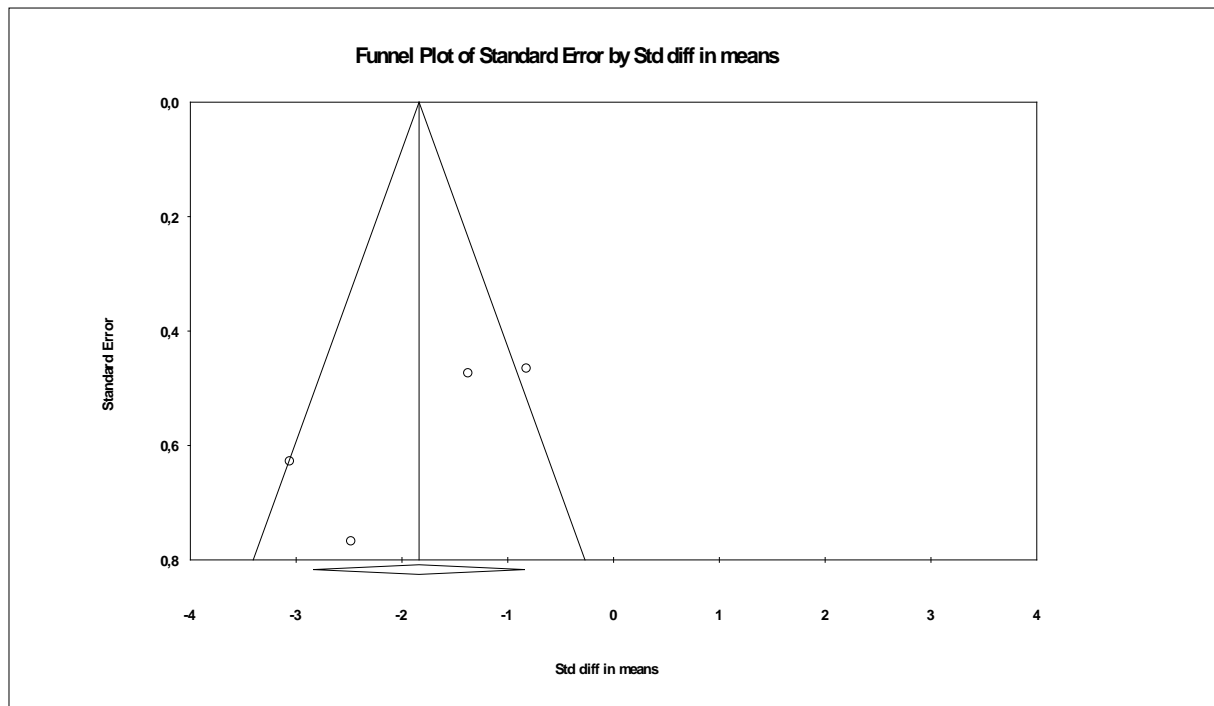

#### Classical fail-safe N:

|                                                                         |                 |
|-------------------------------------------------------------------------|-----------------|
| Z-Value for observed studies:                                           | -6,37817        |
| P-Value for observed studies:                                           | 0,00000         |
| Alpha                                                                   | 0,05000         |
| Tails                                                                   | 2,00000         |
| Z for alpha                                                             | 1,95996         |
| Number of observed studies                                              | 4,00000         |
| <b>Number of missing studies that would bring p-value to &gt; alpha</b> | <b>39,00000</b> |

### 34- Sleep Onset Latency – Eating Disorders

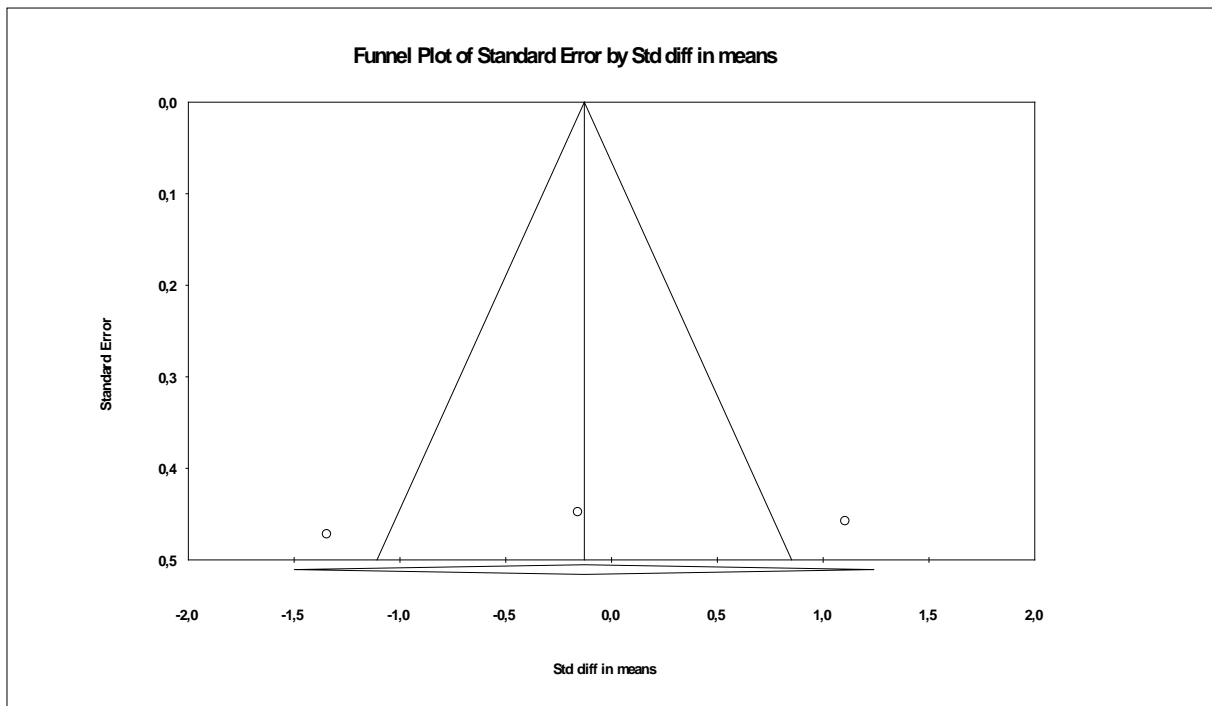

#### Classical fail-safe N:

|                                                                         |                |
|-------------------------------------------------------------------------|----------------|
| Z-Value for observed studies:                                           | -0,45372       |
| P-Value for observed studies:                                           | 0,65003        |
| Alpha                                                                   | 0,05000        |
| Tails                                                                   | 2,00000        |
| Z for alpha                                                             | 1,95996        |
| Number of observed studies                                              | 3,00000        |
| <b>Number of missing studies that would bring p-value to &gt; alpha</b> | <b>0,00000</b> |

35- Duration of stage 1 sleep – Eating Disorders

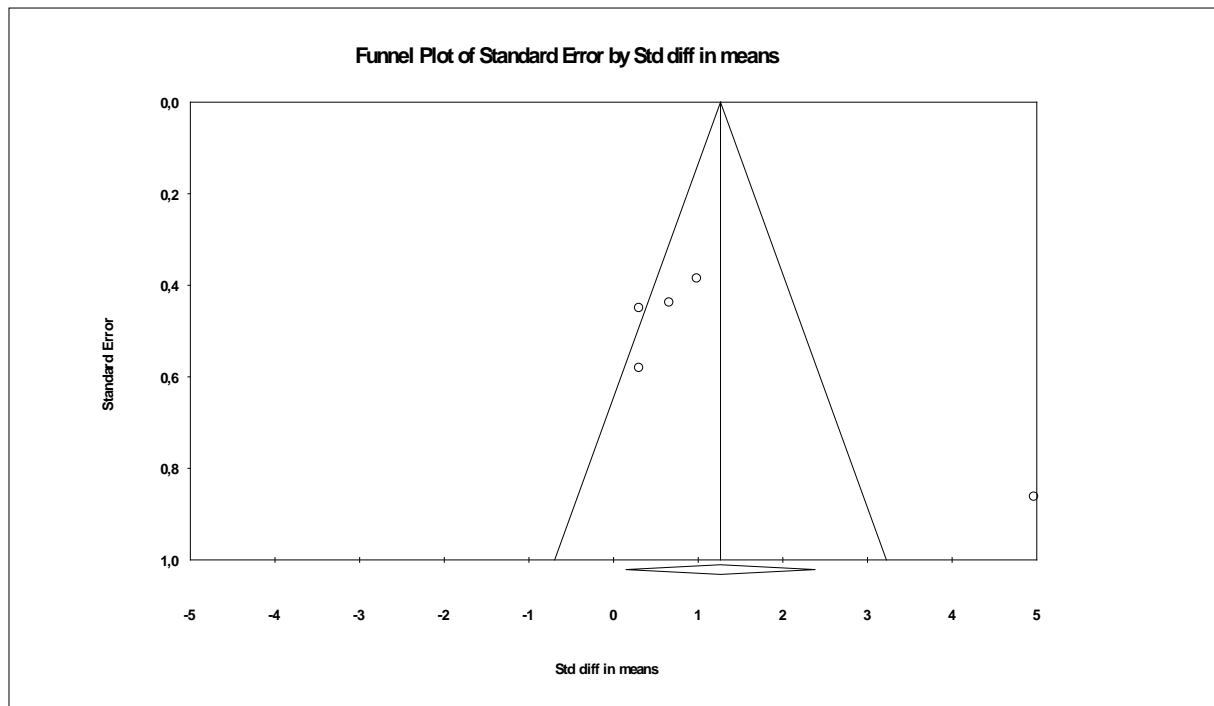

**Classical fail-safe N:**

|                                                                         |                 |
|-------------------------------------------------------------------------|-----------------|
| Z-Value for observed studies:                                           | 4,93109         |
| P-Value for observed studies:                                           | 0,00000         |
| Alpha                                                                   | 0,05000         |
| Tails                                                                   | 2,00000         |
| Z for alpha                                                             | 1,95996         |
| Number of observed studies                                              | 5,00000         |
| <b>Number of missing studies that would bring p-value to &gt; alpha</b> | <b>27,00000</b> |

### 36- Sleep Efficiency Index – Asperger syndrome

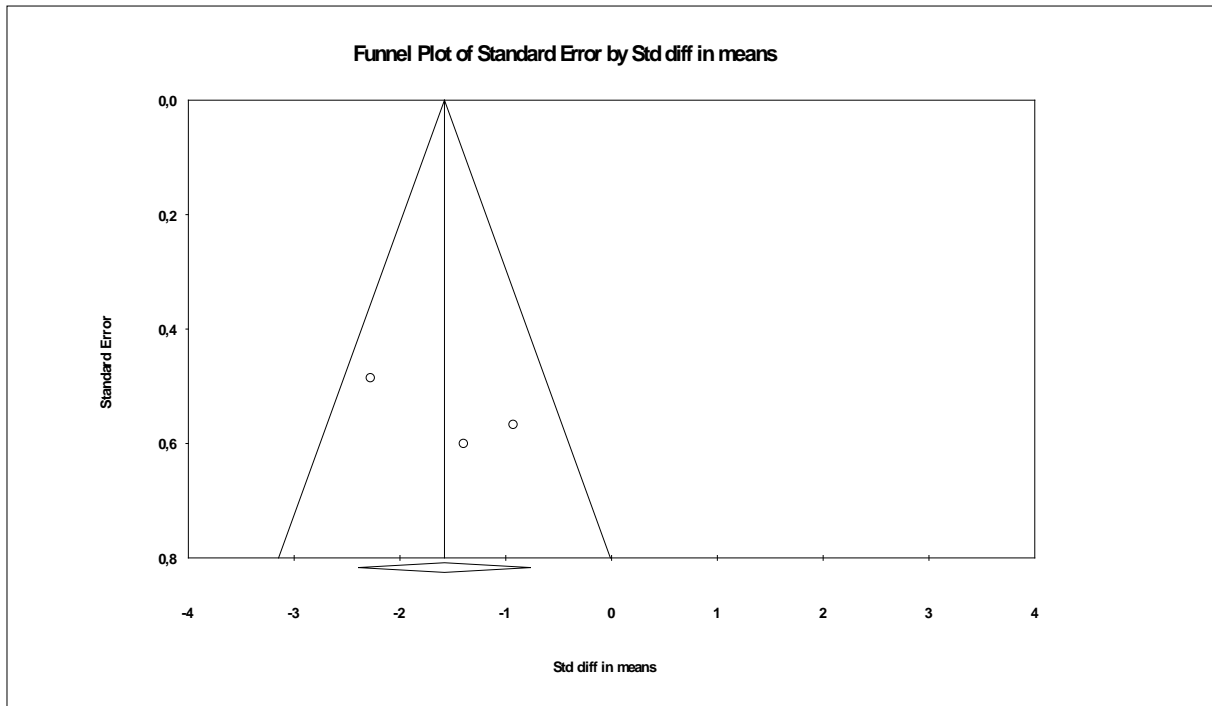

#### Classical fail-safe N:

|                                                                         |                 |
|-------------------------------------------------------------------------|-----------------|
| Z-Value for observed studies:                                           | -4,98282        |
| P-Value for observed studies:                                           | 0,00000         |
| Alpha                                                                   | 0,05000         |
| Tails                                                                   | 2,00000         |
| Z for alpha                                                             | 1,95996         |
| Number of observed studies                                              | 3,00000         |
| <b>Number of missing studies that would bring p-value to &gt; alpha</b> | <b>17,00000</b> |

*37- Sleep Onset Latency – Asperger syndrome*

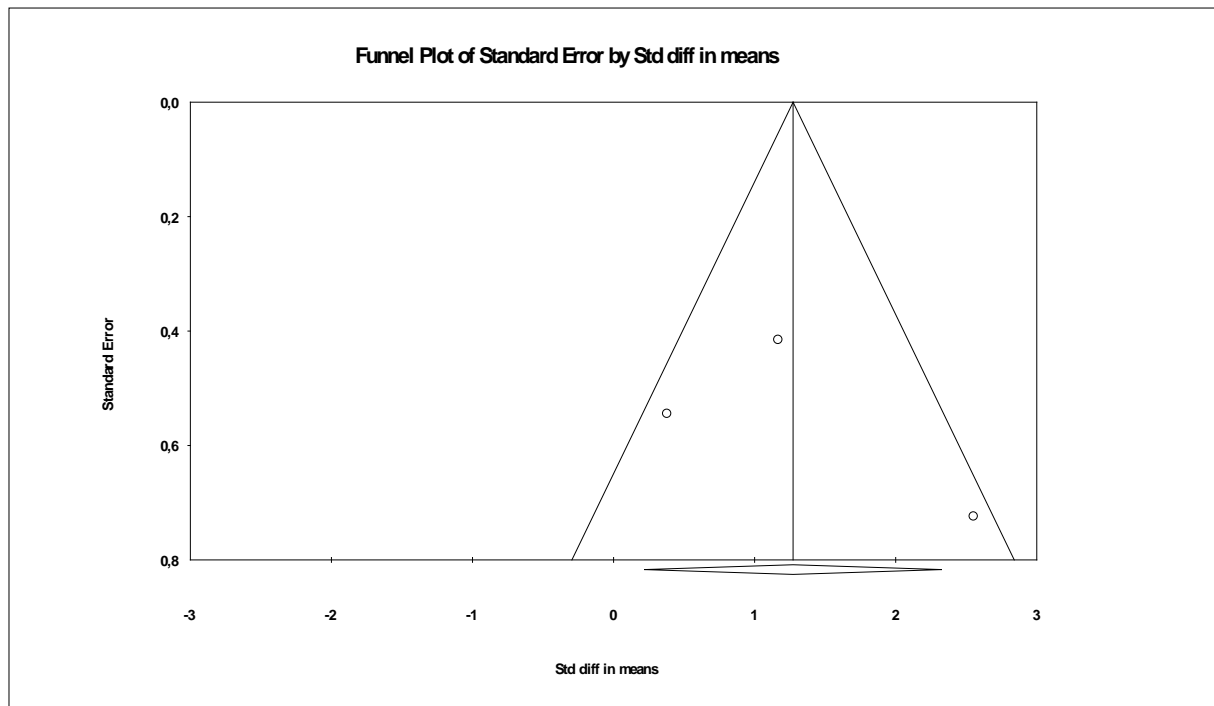

**Classical fail-safe N:**

|                                                                         |                 |
|-------------------------------------------------------------------------|-----------------|
| Z-Value for observed studies:                                           | 4,06303         |
| P-Value for observed studies:                                           | 0,00005         |
| Alpha                                                                   | 0,05000         |
| Tails                                                                   | 2,00000         |
| Z for alpha                                                             | 1,95996         |
| Number of observed studies                                              | 3,00000         |
| <b>Number of missing studies that would bring p-value to &gt; alpha</b> | <b>10,00000</b> |

38- Total Sleep Time – Asperger syndrome

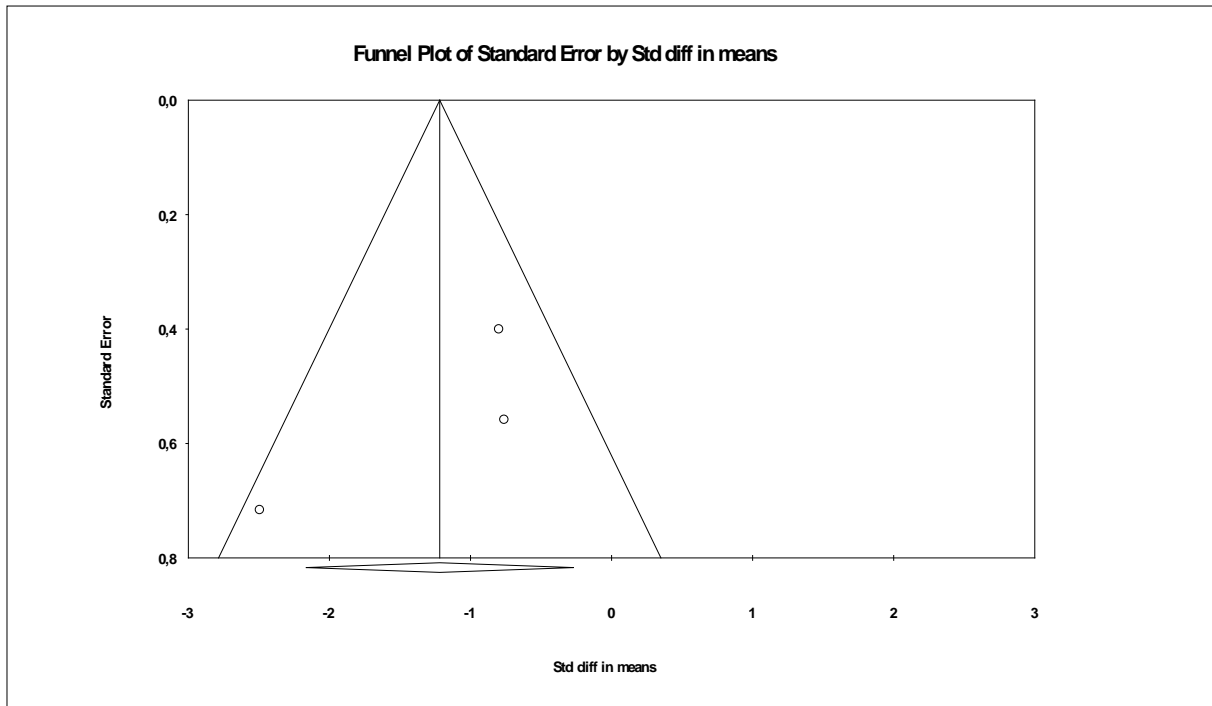

**Classical fail-safe N:**

|                                                                         |                 |
|-------------------------------------------------------------------------|-----------------|
| Z-Value for observed studies:                                           | -3,93954        |
| P-Value for observed studies:                                           | 0,00008         |
| Alpha                                                                   | 0,05000         |
| Tails                                                                   | 2,00000         |
| Z for alpha                                                             | 1,95996         |
| Number of observed studies                                              | 3,00000         |
| <b>Number of missing studies that would bring p-value to &gt; alpha</b> | <b>10,00000</b> |

39- Duration of stage 1 sleep (%) – Asperger syndrome

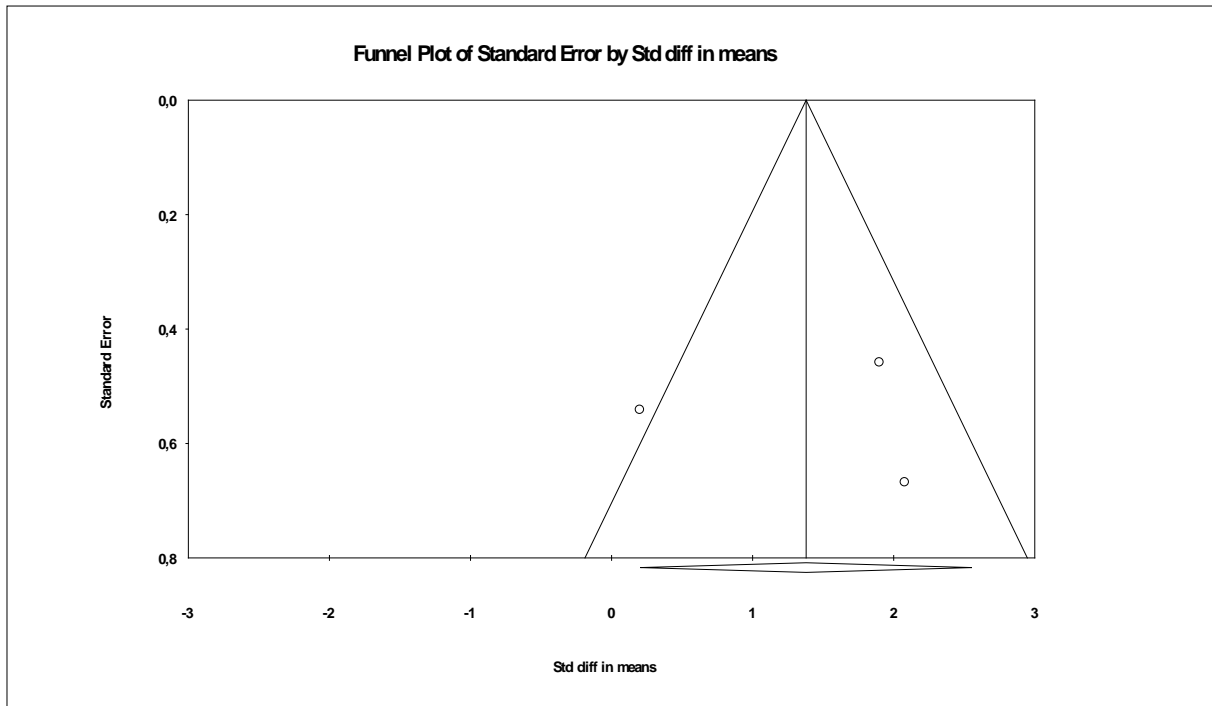

**Classical fail-safe N:**

|                                                                         |                 |
|-------------------------------------------------------------------------|-----------------|
| Z-Value for observed studies:                                           | 4,40620         |
| P-Value for observed studies:                                           | 0,00001         |
| Alpha                                                                   | 0,05000         |
| Tails                                                                   | 2,00000         |
| Z for alpha                                                             | 1,95996         |
| Number of observed studies                                              | 3,00000         |
| <b>Number of missing studies that would bring p-value to &gt; alpha</b> | <b>13,00000</b> |

*40- Sleep Efficiency Index – Autism*

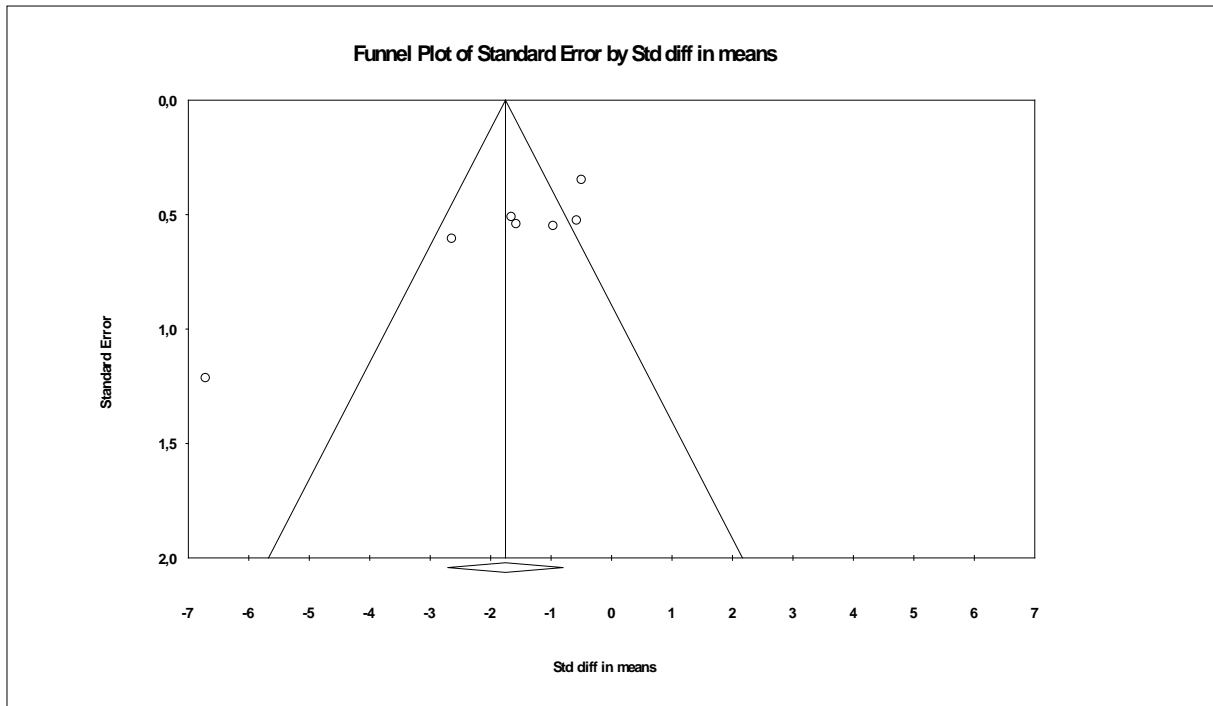

**Classical fail-safe N:**

|                                                                         |                  |
|-------------------------------------------------------------------------|------------------|
| Z-Value for observed studies:                                           | -7,65764         |
| P-Value for observed studies:                                           | 0,00000          |
| Alpha                                                                   | 0,05000          |
| Tails                                                                   | 2,00000          |
| Z for alpha                                                             | 1,95996          |
| Number of observed studies                                              | 7,00000          |
| <b>Number of missing studies that would bring p-value to &gt; alpha</b> | <b>100,00000</b> |



*41- Sleep Onset Latency – Autism*

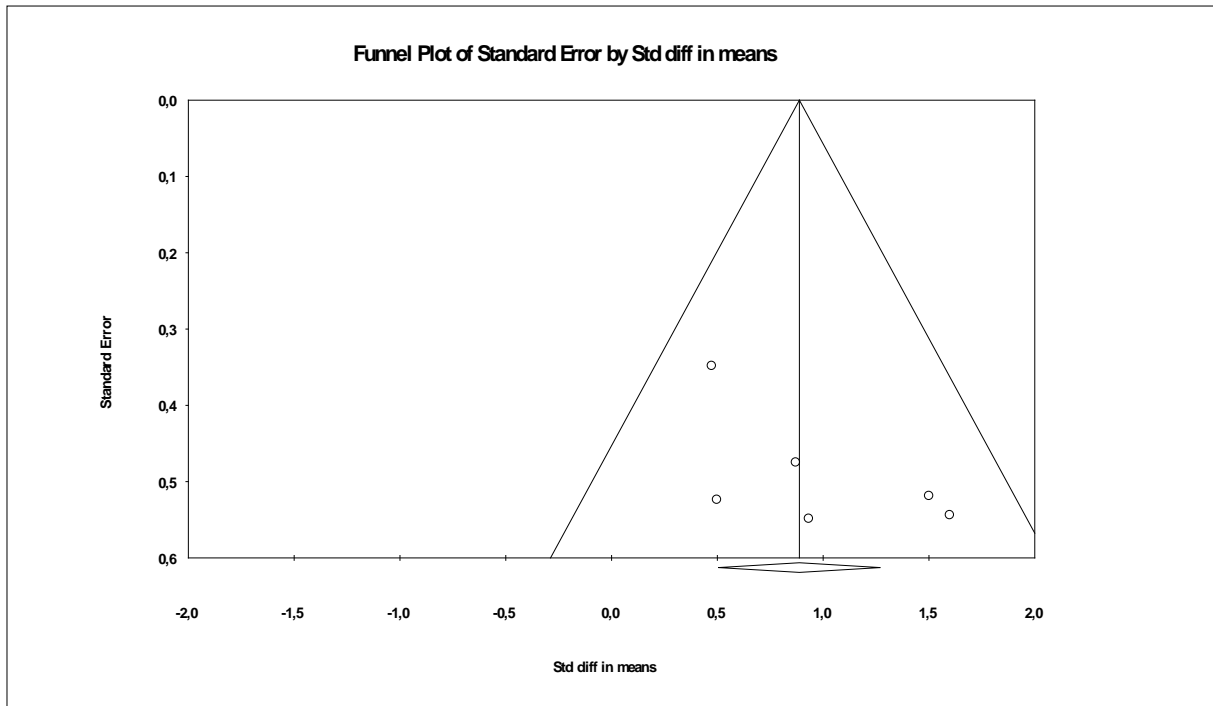

**Classical fail-safe N:**

|                                                                         |                 |
|-------------------------------------------------------------------------|-----------------|
| Z-Value for observed studies:                                           | 4,76911         |
| P-Value for observed studies:                                           | 0,00000         |
| Alpha                                                                   | 0,05000         |
| Tails                                                                   | 2,00000         |
| Z for alpha                                                             | 1,95996         |
| Number of observed studies                                              | 6,00000         |
| <b>Number of missing studies that would bring p-value to &gt; alpha</b> | <b>30,00000</b> |

42- Total Sleep Time – Autism

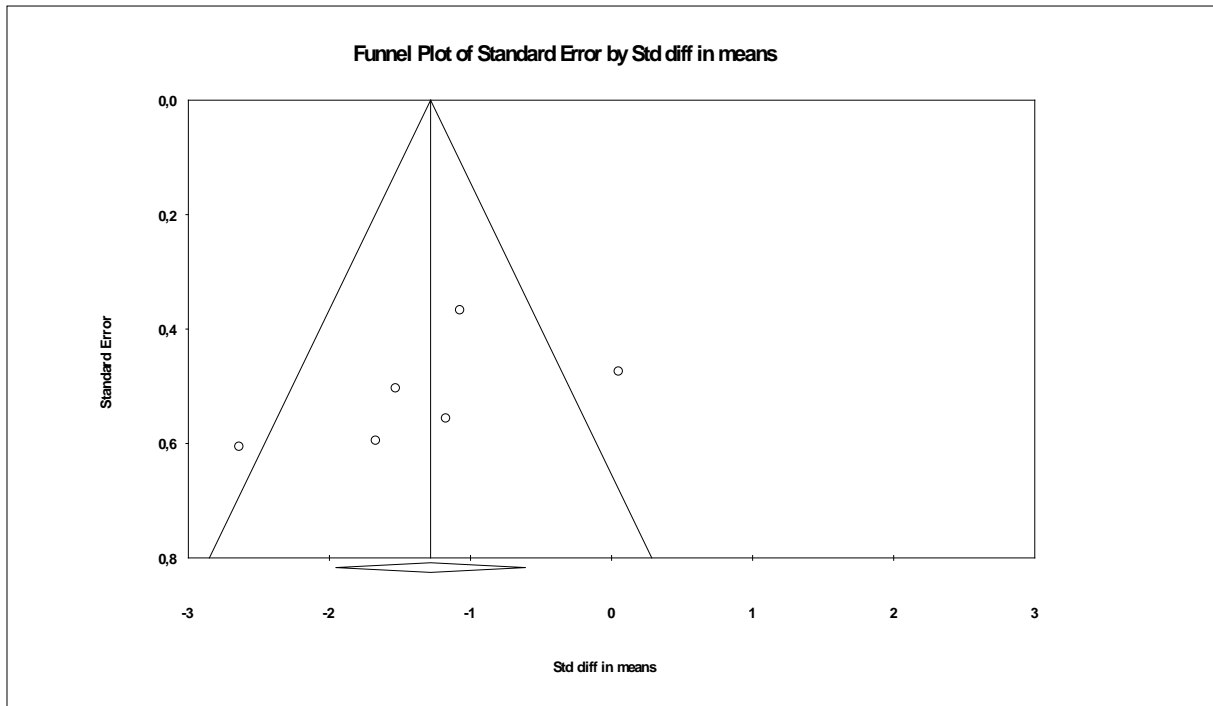

**Classical fail-safe N:**

|                                                                         |                 |
|-------------------------------------------------------------------------|-----------------|
| Z-Value for observed studies:                                           | -6,16788        |
| P-Value for observed studies:                                           | 0,00000         |
| Alpha                                                                   | 0,05000         |
| Tails                                                                   | 2,00000         |
| Z for alpha                                                             | 1,95996         |
| Number of observed studies                                              | 6,00000         |
| <b>Number of missing studies that would bring p-value to &gt; alpha</b> | <b>54,00000</b> |

43- Number of awakenings – Autism

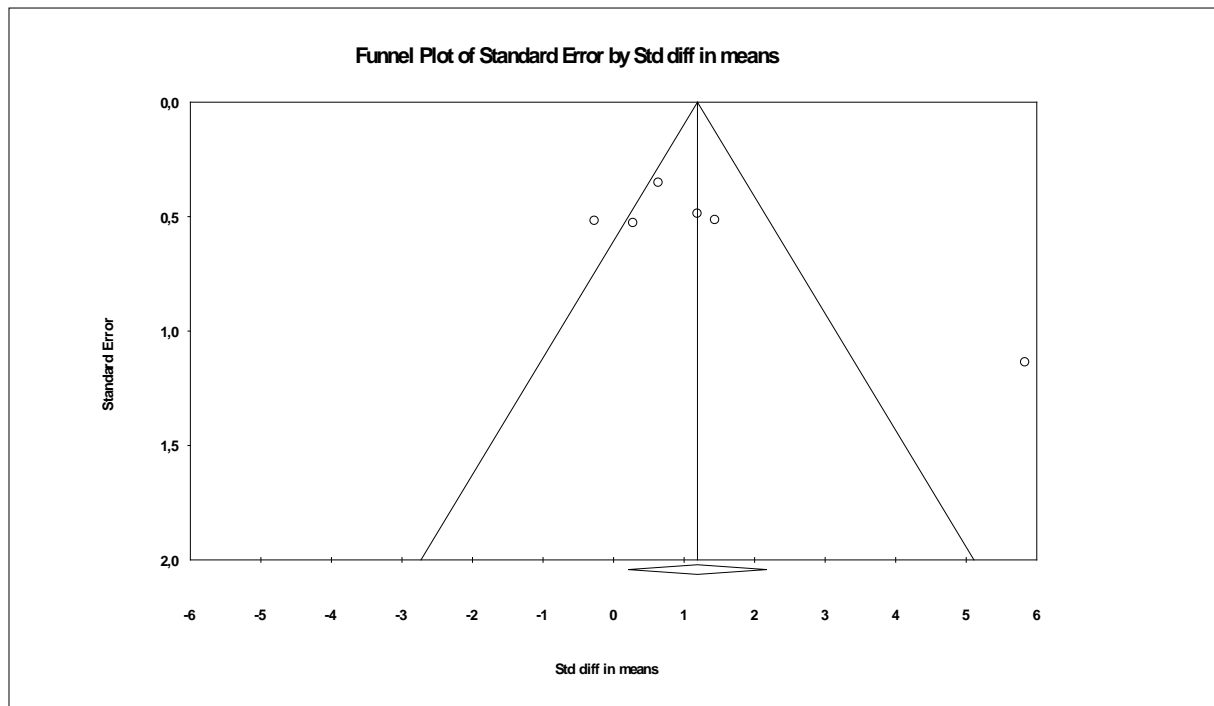

**Classical fail-safe N:**

|                                                                         |                 |
|-------------------------------------------------------------------------|-----------------|
| Z-Value for observed studies:                                           | 4,98281         |
| P-Value for observed studies:                                           | 0,00000         |
| Alpha                                                                   | 0,05000         |
| Tails                                                                   | 2,00000         |
| Z for alpha                                                             | 1,95996         |
| Number of observed studies                                              | 6,00000         |
| <b>Number of missing studies that would bring p-value to &gt; alpha</b> | <b>33,00000</b> |

44- Total time awake during the night – Autism

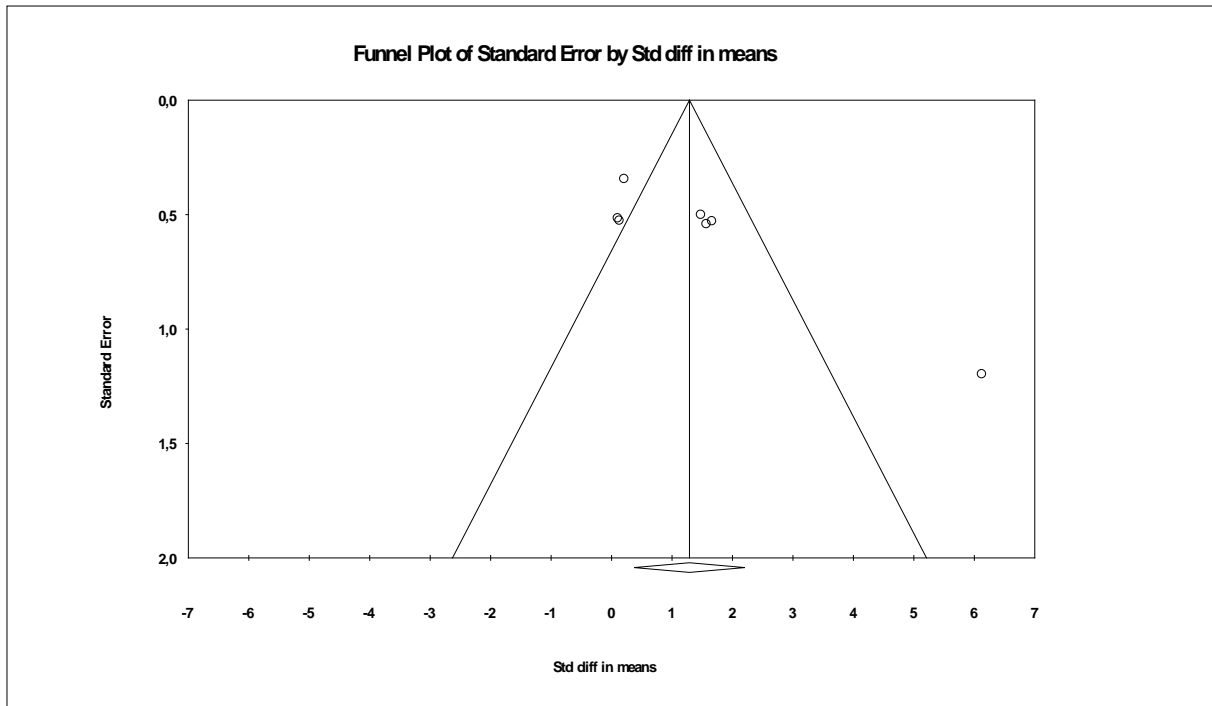

**Classical fail-safe N:**

|                                                                         |                 |
|-------------------------------------------------------------------------|-----------------|
| Z-Value for observed studies:                                           | 5,74342         |
| P-Value for observed studies:                                           | 0,00000         |
| Alpha                                                                   | 0,05000         |
| Tails                                                                   | 2,00000         |
| Z for alpha                                                             | 1,95996         |
| Number of observed studies                                              | 7,00000         |
| <b>Number of missing studies that would bring p-value to &gt; alpha</b> | <b>54,00000</b> |

45- Duration of REM sleep– Autism

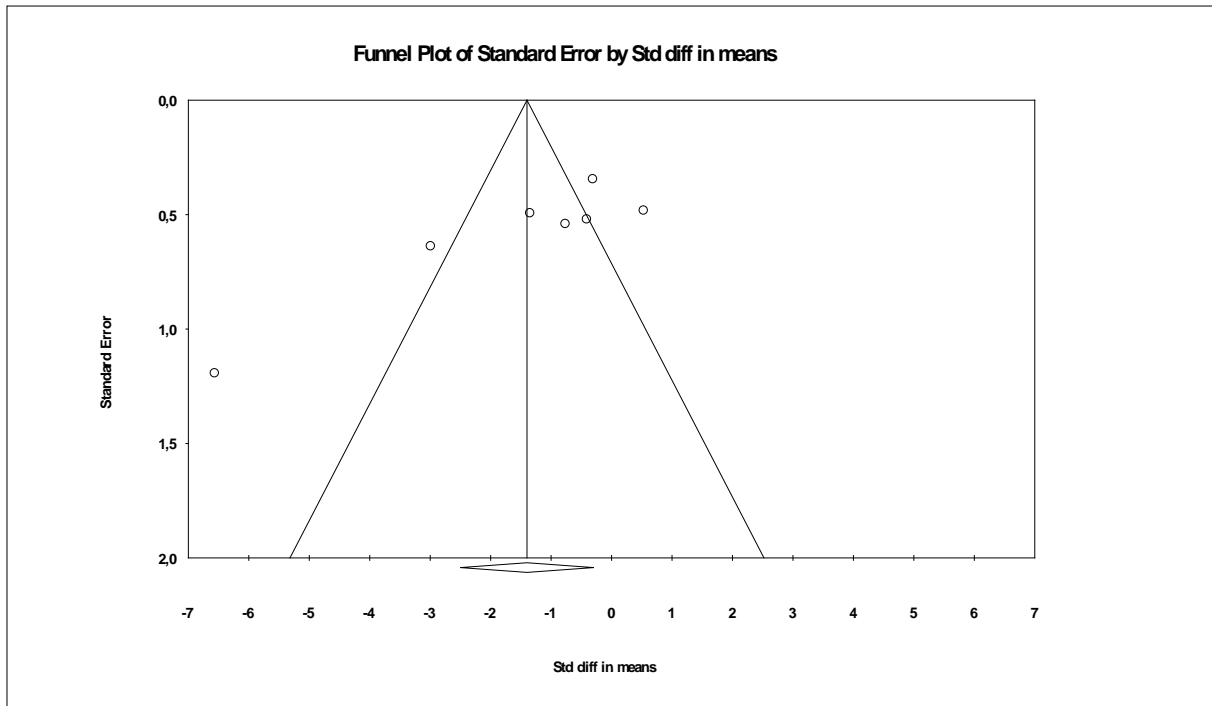

**Classical fail-safe N:**

|                                                                         |                 |
|-------------------------------------------------------------------------|-----------------|
| Z-Value for observed studies:                                           | -5,61092        |
| P-Value for observed studies:                                           | 0,00000         |
| Alpha                                                                   | 0,05000         |
| Tails                                                                   | 2,00000         |
| Z for alpha                                                             | 1,95996         |
| Number of observed studies                                              | 7,00000         |
| <b>Number of missing studies that would bring p-value to &gt; alpha</b> | <b>51,00000</b> |

46- Sleep Efficiency Index – Borderline personality disorder

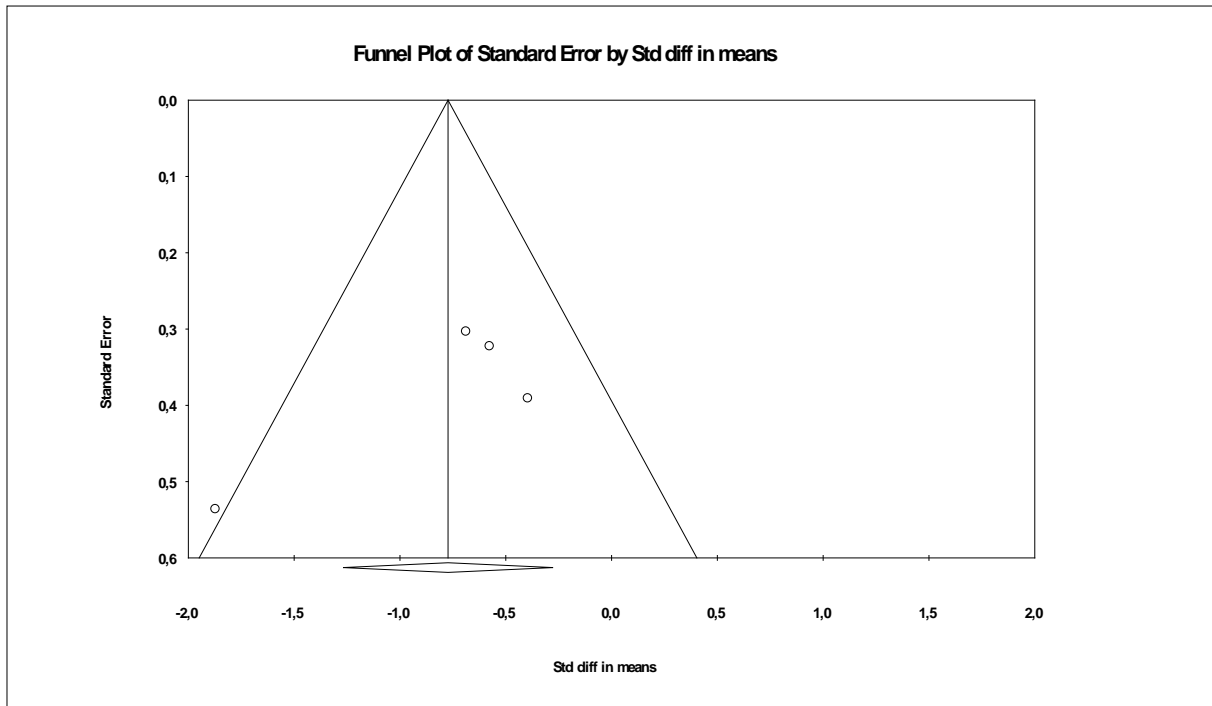

**Classical fail-safe N:**

|                                                                         |                 |
|-------------------------------------------------------------------------|-----------------|
| Z-Value for observed studies:                                           | -4,27226        |
| P-Value for observed studies:                                           | 0,00002         |
| Alpha                                                                   | 0,05000         |
| Tails                                                                   | 2,00000         |
| Z for alpha                                                             | 1,95996         |
| Number of observed studies                                              | 4,00000         |
| <b>Number of missing studies that would bring p-value to &gt; alpha</b> | <b>16,00000</b> |

47- Total Sleep Time – Borderline personality disorder

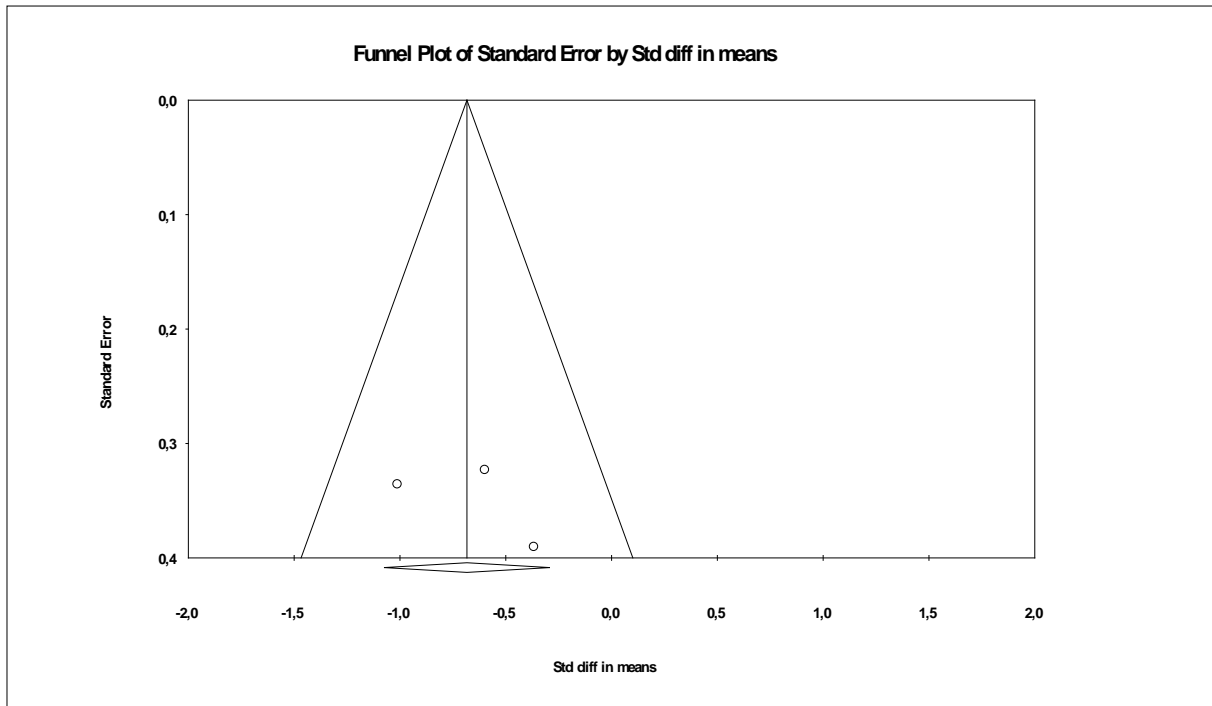

**Classical fail-safe N:**

|                                                                         |                |
|-------------------------------------------------------------------------|----------------|
| Z-Value for observed studies:                                           | -3,34646       |
| P-Value for observed studies:                                           | 0,00082        |
| Alpha                                                                   | 0,05000        |
| Tails                                                                   | 2,00000        |
| Z for alpha                                                             | 1,95996        |
| Number of observed studies                                              | 3,00000        |
| <b>Number of missing studies that would bring p-value to &gt; alpha</b> | <b>6,00000</b> |

*48- Number of Awakenings – Borderline personality disorder*

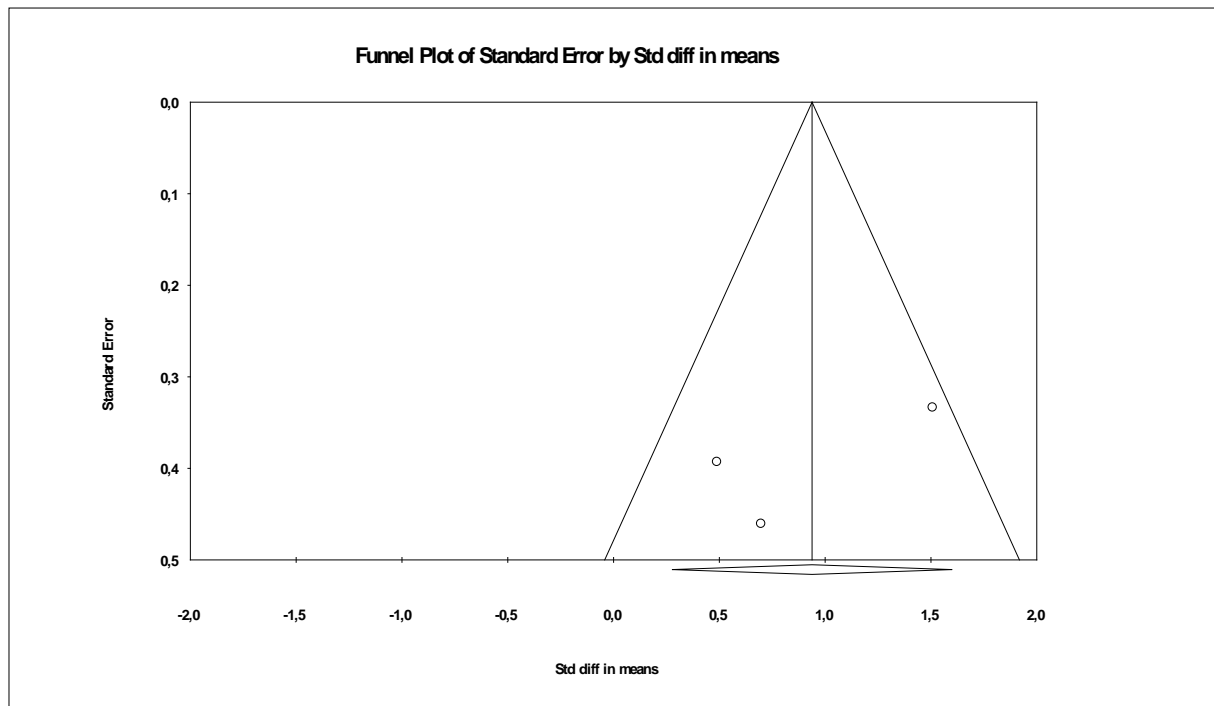

**Classical fail-safe N:**

|                                                                         |                 |
|-------------------------------------------------------------------------|-----------------|
| Z-Value for observed studies:                                           | 4,20646         |
| P-Value for observed studies:                                           | 0,00003         |
| Alpha                                                                   | 0,05000         |
| Tails                                                                   | 2,00000         |
| Z for alpha                                                             | 1,95996         |
| Number of observed studies                                              | 3,00000         |
| <b>Number of missing studies that would bring p-value to &gt; alpha</b> | <b>11,00000</b> |



*49- Total time awake during the night – Borderline personality disorder*

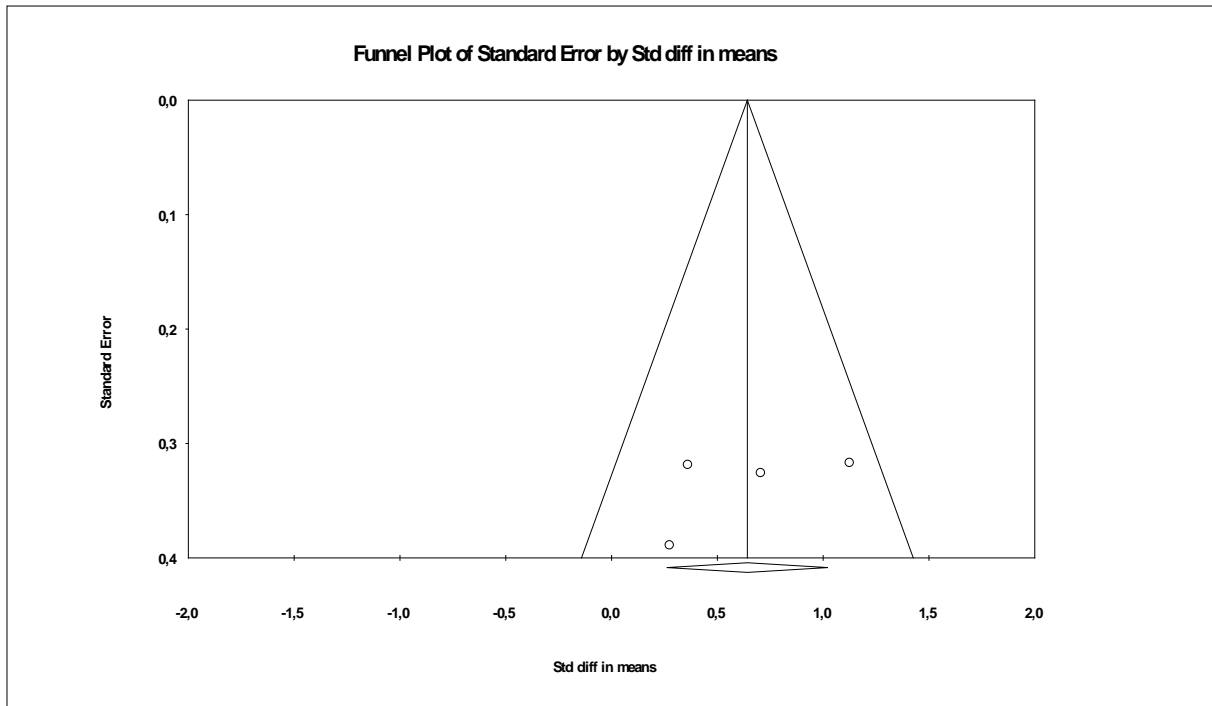

**Classical fail-safe N:**

|                                                                         |                 |
|-------------------------------------------------------------------------|-----------------|
| Z-Value for observed studies:                                           | 3,78027         |
| P-Value for observed studies:                                           | 0,00016         |
| Alpha                                                                   | 0,05000         |
| Tails                                                                   | 2,00000         |
| Z for alpha                                                             | 1,95996         |
| Number of observed studies                                              | 4,00000         |
| <b>Number of missing studies that would bring p-value to &gt; alpha</b> | <b>11,00000</b> |

*50- REM Latency – Borderline personality disorder*

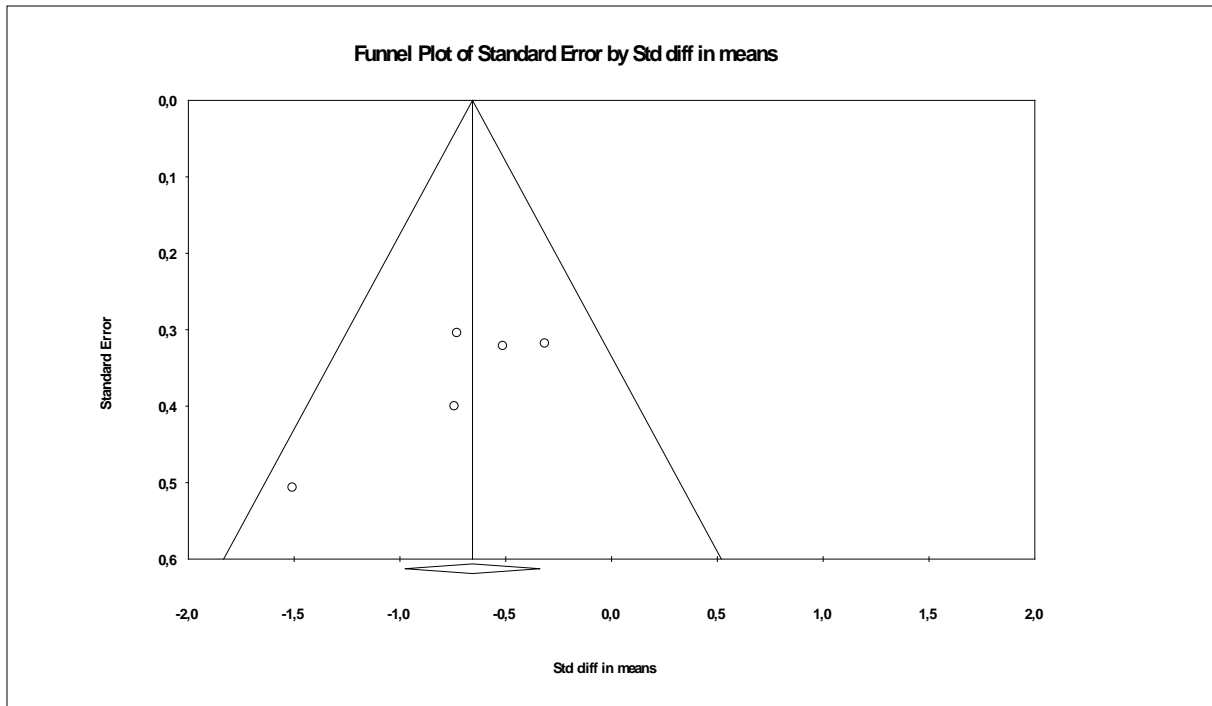

**Classical fail-safe N:**

|                                                                         |                 |
|-------------------------------------------------------------------------|-----------------|
| Z-Value for observed studies:                                           | -4,38508        |
| P-Value for observed studies:                                           | 0,00001         |
| Alpha                                                                   | 0,05000         |
| Tails                                                                   | 2,00000         |
| Z for alpha                                                             | 1,95996         |
| Number of observed studies                                              | 5,00000         |
| <b>Number of missing studies that would bring p-value to &gt; alpha</b> | <b>21,00000</b> |

*51- Sleep Efficiency Index – Schizophrenia*

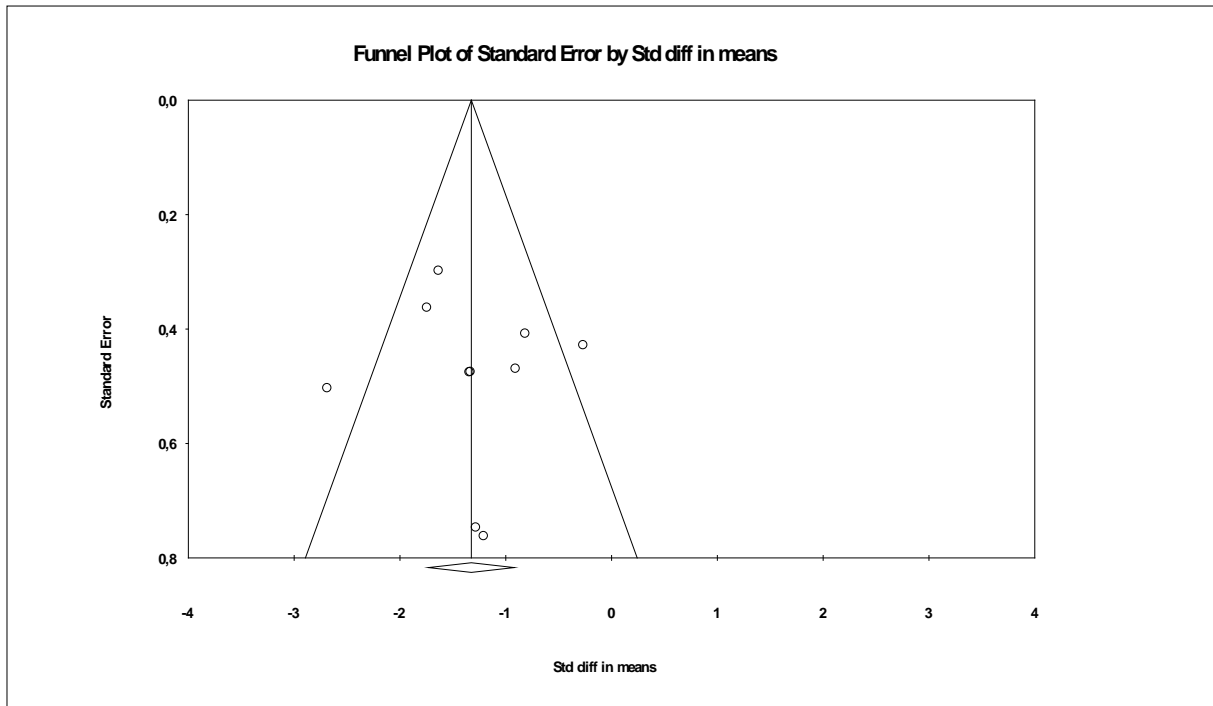

**Classical fail-safe N:**

|                                                                         |                  |
|-------------------------------------------------------------------------|------------------|
| Z-Value for observed studies:                                           | -9,19632         |
| P-Value for observed studies:                                           | 0,00000          |
| Alpha                                                                   | 0,05000          |
| Tails                                                                   | 2,00000          |
| Z for alpha                                                             | 1,95996          |
| Number of observed studies                                              | 10,00000         |
| <b>Number of missing studies that would bring p-value to &gt; alpha</b> | <b>211,00000</b> |

52- Sleep Onset Latency – Schizophrenia

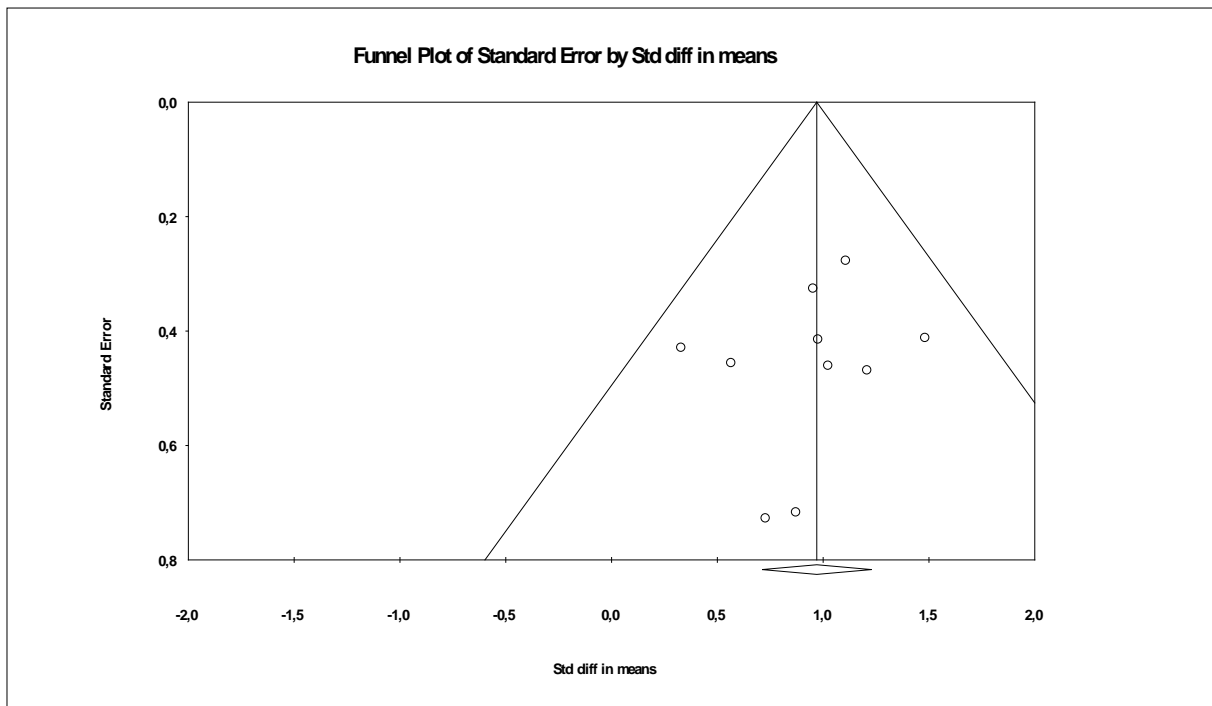

**Classical fail-safe N:**

|                                                                         |                  |
|-------------------------------------------------------------------------|------------------|
| Z-Value for observed studies:                                           | 6,92624          |
| P-Value for observed studies:                                           | 0,00000          |
| Alpha                                                                   | 0,05000          |
| Tails                                                                   | 2,00000          |
| Z for alpha                                                             | 1,95996          |
| Number of observed studies                                              | 10,00000         |
| <b>Number of missing studies that would bring p-value to &gt; alpha</b> | <b>115,00000</b> |

53- Total Sleep Time – Schizophrenia

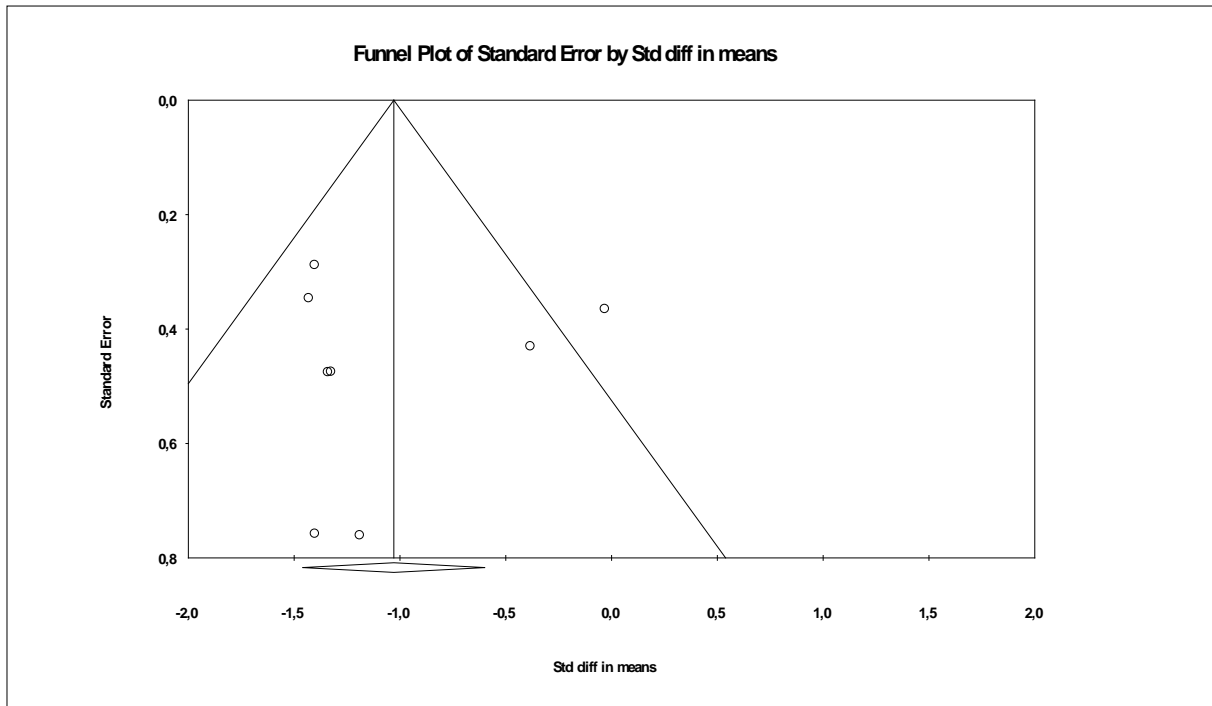

**Classical fail-safe N:**

|                                                                         |                 |
|-------------------------------------------------------------------------|-----------------|
| Z-Value for observed studies:                                           | -6,71470        |
| P-Value for observed studies:                                           | 0,00000         |
| Alpha                                                                   | 0,05000         |
| Tails                                                                   | 2,00000         |
| Z for alpha                                                             | 1,95996         |
| Number of observed studies                                              | 8,00000         |
| <b>Number of missing studies that would bring p-value to &gt; alpha</b> | <b>86,00000</b> |

54- Total time awake during the night – Schizophrenia

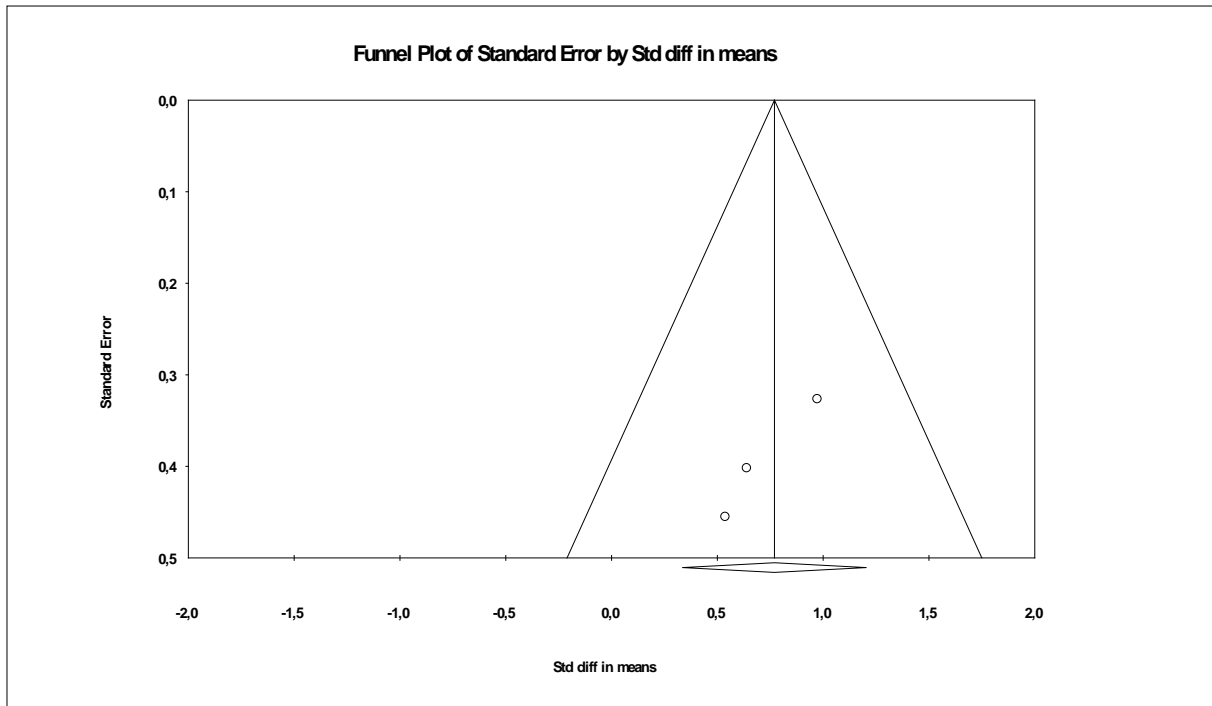

**Classical fail-safe N:**

|                                                                         |                |
|-------------------------------------------------------------------------|----------------|
| Z-Value for observed studies:                                           | 3,32368        |
| P-Value for observed studies:                                           | 0,00089        |
| Alpha                                                                   | 0,05000        |
| Tails                                                                   | 2,00000        |
| Z for alpha                                                             | 1,95996        |
| Number of observed studies                                              | 3,00000        |
| <b>Number of missing studies that would bring p-value to &gt; alpha</b> | <b>6,00000</b> |
